1 **Metabolic switching and cell wall remodelling of *Mycobacterium tuberculosis* during bone**  
2 **tuberculosis**

3 Khushpreet Kaur<sup>1</sup>, Sumedha Sharma<sup>1¶</sup>, Sudhanshu Abhishek Sinha<sup>2¶</sup>, Prabhdeep Kaur<sup>1</sup>, Uttam  
4 Chand Saini<sup>3</sup>, Mandeep Singh Dhillon<sup>3</sup>, Petros C. Karakousis<sup>4</sup>, Indu Verma<sup>1\*</sup>

5 1. Dept. of Biochemistry, Postgraduate Institute of Medical Education and Research,  
6 Chandigarh, India.

7 2. Dept. of Biochemistry and Molecular Biology, Uniformed Services University of the  
8 Health Sciences, Bethesda, MD, United States.

9 3. Dept. of Orthopaedics, Postgraduate Institute of Medical Education and Research,  
10 Chandigarh, India.

11 4. Centers for Tuberculosis Research and Systems Approaches for Infectious Diseases,  
12 School of Medicine, Johns Hopkins University, Baltimore, MD, United States.

13 \* **Correspondence:** Prof. Indu Verma, Email: [induvermabio@gmail.com](mailto:induvermabio@gmail.com)

14 ¶ These authors contributed equally to this work.

15 

---

16 **Running Title:** *M. tuberculosis* transcriptome in bone tuberculosis

17

18 **Abstract:**

19 Bone tuberculosis is widely characterized by irreversible bone destruction caused by  
20 *Mycobacterium tuberculosis*. *Mycobacterium* has the ability to adapt to various environmental  
21 stresses by altering its transcriptome in order to establish infection in the host. Thus, it is of  
22 critical importance to understand the transcriptional profile of *M. tuberculosis* during infection  
23 in the bone environment compared to axenic cultures of exponentially growing M.tb. In the  
24 current study, we characterized the in vivo transcriptome of *M. tuberculosis* within abscesses  
25 or necrotic specimens obtained from patients with bone TB using whole genome microarrays  
26 in order to gain insight into the *M. tuberculosis* adaptive response within this host  
27 microenvironment. A total of 914 mycobacterial genes were found to be significantly over-  
28 expressed and 1688 were repressed (fold change>2;  $p$ -value  $\leq 0.05$ ) in human bone TB  
29 specimens. Overall, the mycobacteria displayed a hypo-metabolic state with significant  
30 ( $p \leq 0.05$ ) downregulation of major pathways involved in translational machinery, cellular and  
31 protein metabolism and response to hypoxia. However, significant enrichment ( $p \leq 0.05$ ) of  
32 amino-sugar metabolic processes, membrane glycolipid biosynthesis, amino acid biosynthesis  
33 (serine, glycine, arginine and cysteine) and accumulation of mycolyl-arabinogalactan-  
34 peptidoglycan complex suggests possible mycobacterial survival strategies within the bone  
35 lesions by strengthening its cell wall and cellular integrity. Data were also screened for M.tb  
36 virulence proteins using Virulent Pred and VICM Pred tools, which revealed five genes  
37 (*Rv1046c*, *Rv1230c*, *DppD*, *PE\_PGRS26* and *PE\_PGRS43*) with a possible role in the  
38 pathogenesis of bone TB. Next, an osteoblast cell line model for bone TB was developed  
39 allowing for significant intracellular multiplication of M.tb. Interestingly, three virulence genes  
40 (*Rv1046c*, *DppD* and *PE\_PGRS26*) identified from human bone TB microarray data were also  
41 found to be overexpressed by intracellular *M. tuberculosis* in osteoblast cell lines. Overall,  
42 these data demonstrate that *M. tuberculosis* alters its transcriptome as an adaptive strategy to  
43 survive in the host and establish infection in bone. Additionally, the *in vitro* osteoblast model  
44 we describe may facilitate our understanding of the pathogenesis of bone TB.

45 **Author Summary:** Musculoskeletal tuberculosis is the third most common manifestation of  
46 extra-pulmonary tuberculosis and massive bone destruction along with vertebral discs are one  
47 of the hallmarks of this disease. *Mycobacterium tuberculosis*, the causative agent, has the  
48 tremendous potential to adapt itself to different host environments due to its ability to alter the

49 expression of genes/proteins belonging to different pathways. This study shows that the  
50 mycobacterial infection in bone is driven by the increased expression of genes belonging to  
51 cell wall remodelling and DNA damage repair pathways important for its survival. Further data  
52 analysis showed that some of these genes are coding for proteins possessing virulence potential  
53 that may be essential for survival of *M. tuberculosis* under such hostile environment of bone.  
54 We also developed an in vitro model of bone tuberculosis using an osteoblast cell line and  
55 validated the expression of these virulence factors. Identification of such virulence factors in  
56 the bone environment by *M. tuberculosis* may aid to identify new therapeutic targets for bone  
57 TB. Further, development of cell line model for bone TB is important to understand some  
58 unknown facets of this disease.

59 **Keywords:** Transcriptome, bone tuberculosis, *M. tuberculosis*, gene expression, virulence,  
60 osteoblasts.

## 61 **Introduction**

62 Bone tuberculosis (TB) is one of the ancient extra-pulmonary manifestations of TB, as  
63 evidenced by the traces of DNA and cell wall mycolates detected in femurs of Egyptian  
64 mummies<sup>1</sup>. In India, it accounts for 10-25% of extra-pulmonary TB (EPTB) cases<sup>2</sup> and the  
65 prevalence of disease has been increasing in other endemic countries. The spine (tuberculous  
66 spondylitis/Pott's spine) is the most commonly affected skeletal site, accounting for >50% of  
67 bone TB cases. The disease is widely characterized by bone resorption, destruction of the  
68 vertebral bodies, discs, and formation of abscesses, eventually leading to vertebral collapse and  
69 kyphotic deformities<sup>3</sup>. Necrotic caseation and cold abscesses are the characteristic findings of  
70 tuberculous spondylitis in the majority of bone lesions<sup>4</sup>. Early diagnosis of bone TB is  
71 challenging due to its pauci-bacillary nature, deep inaccessible lesions, non-specific symptoms  
72 and resemblance of the disease to various other bone diseases and infections. Diagnosis of the

73 disease mainly relies on clinical and radiological findings. However, if undiagnosed, it  
74 eventually leads to paraplegia and neurological abnormalities associated with long-term  
75 morbidity<sup>5</sup>. A few studies have revealed how mycobacterial infection disrupts the bone  
76 homeostasis and favours enhanced osteoclastogenesis, ultimately causing bone destruction<sup>6,7</sup>.

77 *Mycobacterium tuberculosis*, an obligate aerobic bacterium, thrives best in oxygen-rich  
78 environments such as the lungs, but it can also survive and establish infection in contained  
79 osseous tissue<sup>8</sup>. This is possible due to *M. tuberculosis* adaptations to different stresses and  
80 host environments, primarily involving alterations in its gene expression profile. Various  
81 studies have revealed the differential expression patterns of mycobacteria isolated from  
82 different sites within the human host<sup>9-11</sup>. The transcriptional profile of mycobacteria isolated  
83 from the lung granulomatous region is different from that obtained from normal-appearing  
84 lungs in *M. tuberculosis*-infected individuals<sup>12</sup>. The altered gene expression of *M. tuberculosis*  
85 under various physiologically relevant stress conditions, e.g., hypoxia and nutrient starvation,  
86 is accompanied by a switch from active growth to a more stable dormant state characterized by  
87 reduced metabolism and cell wall thickening<sup>13,14</sup>. Thus, in the present study, we aimed to  
88 understand mycobacterial adaptations to the bone environment by investigating its  
89 transcriptome within abscesses or necrotic specimens harvested from patients with bone TB.  
90 As a further step in elucidating key mycobacterial virulence factors in bone TB, we developed  
91 an in vitro osteoblast model of *M. tuberculosis* infection and confirmed the gene expression  
92 patterns of selected virulent proteins.

## 93 **Results:**

### 94 **Transcriptional profile of *M. tuberculosis* in human bone lesions:**

95 The transcriptional profile of *M. tuberculosis* within bone specimens obtained from patients  
96 (n=5) was analyzed in comparison to exponentially growing *M. tuberculosis* H37Rv using  
97 whole genome microarrays. Differentially expressed genes (DEGs) were filtered with a fold

98 change cut off of 2 ( $>2$  or  $\leq -2$ ) and a p-value  $\leq 0.05$  (Fig. 1a). Data for the same have been  
 99 submitted as gene expression omnibus (GEO) dataset vide accession no. (GSE-165232).  
 100 Analysis revealed 2602 DEGs (Table S2), of which 914 genes were upregulated and 1688 were  
 101 downregulated. A representative heat map and hierarchical clustering analysis of the same is  
 102 shown in Figure 1b. DEGs were classified into functional categories as per the tuberculist  
 103 database (Table 1).

| S. No.       | Functional categories <sup>a</sup>                       | Upregulated | p-value<br>(Hypergeometric<br>Probability) | Downregulated | p-value<br>(Hypergeometric<br>Probability) | Total |
|--------------|----------------------------------------------------------|-------------|--------------------------------------------|---------------|--------------------------------------------|-------|
| 1            | Virulence, detoxification, adaptation (239) <sup>b</sup> | 46 (5%)     | <b>0.034</b>                               | 105 (6%)      | <b>0.0348</b>                              | 151   |
| 2            | Cell wall and cell processes (772)                       | 183 (20%)   | <b>0.021</b>                               | 347 (21%)     | <b>0.0017</b>                              | 530   |
| 3            | Lipid metabolism (272)                                   | 62 (7%)     | 0.059                                      | 118 (7%)      | <b>0.036</b>                               | 180   |
| 4            | Intermediary metabolism and respiration (936)            | 213 (23%)   | <b>0.032</b>                               | 374 (22%)     | <b>0.022</b>                               | 587   |
| 5            | Conserved hypotheticals (1042)                           | 236 (26%)   | <b>0.032</b>                               | 400 (24%)     | <b>0.0037</b>                              | 636   |
| 6            | Information pathways (242)                               | 42 (5%)     | <b>0.011</b>                               | 125 (7%)      | <b>1.509 e-4</b>                           | 167   |
| 7            | PE/PPE (168)                                             | 44 (5%)     | <b>0.033</b>                               | 68 (4%)       | 0.063                                      | 112   |
| 8            | Stable RNAs (80)                                         | 2 (0%)      | <b>3.986 e-7</b>                           | 31 (2%)       | 0.0841                                     | 33    |
| 9            | Regulatory proteins (198)                                | 48 (5%)     | 0.053                                      | 84 (5%)       | 0.0542                                     | 132   |
| 10           | Insertion seqs and phages (147)                          | 35 (4%)     | 0.070                                      | 29 (2%)       | <b>1.264 e-8</b>                           | 64    |
| 11           | Unknown (15)                                             | 3 (0%)      | 0.245                                      | 7 (0%)        | 0.184                                      | 10    |
| Total (4111) |                                                          | 914         |                                            | 1688          |                                            | 2602  |

<sup>a</sup> Various functional Categories of *M. tuberculosis* H37Rv as listed on the tuberculist database

<sup>b</sup> Number represents the total number of genes in each tuberculist category of *M.tb* H37Rv.

<sup>c</sup> Bold values indicate statistical significance at  $p < 0.05$

**Table 1:** Functional categorization of differentially expressed genes of *Mycobacterium tuberculosis* in human bone TB specimens based on the tuberculist database.

104 As shown in Figure 1c, the largest proportion of genes were classified as conserved  
 105 hypothetical proteins (24%), followed by intermediary metabolism and respiration (23%), cell  
 106 wall and cell processes (20%), lipid metabolism (7%) and virulence, detoxification, adaptations  
 107 (6%) and information pathways (6%). A detailed analysis of upregulated and downregulated  
 108 genes within each category is given in Table S3.

109 **Mycobacterial adaptation within the bone microenvironment:**

110 For further analysis of *M. tuberculosis* adaptation within the bone microenvironment, pathway  
111 enrichment analysis was performed using the Biocyc database and Fisher's exact test with post  
112 hoc Benjamini-Hochberg correction ( $p \leq 0.05$ ) for statistical analysis. This analysis identified  
113 significantly positively and negatively enriched pathways, transcriptional/translational  
114 regulators, and gene ontology (GO) terms among the upregulated and downregulated  
115 categories, respectively (Figs. 2a and 2b). Although there were no significant positively  
116 enriched pathways among upregulated DEGs after using post hoc correction, usage of only  
117 Fisher's exact statistical analysis without post hoc correction led to identification of 77  
118 positively enriched pathways with a  $p$ -value  $\leq 0.05$  (Table S4). Further, among downregulated  
119 DEGs, 38 negatively enriched pathways were observed (Table S5).

120 **Upregulated pathways:** Among the 77 positively enriched pathways, significantly enriched  
121 pathways belonged to amino-sugar metabolism ( $p \leq 0.005$ ), membrane lipid metabolism and  
122 synthesis ( $p \leq 0.005$ ), and biosynthesis of mycolyl-arabinogalactan-peptidoglycan (mAGP)  
123 complex ( $p \leq 0.005$ ). Besides these, various other biosynthetic pathways were enriched,  
124 including synthesis of several amino acids (arginine, serine and glycine ( $p \leq 0.01$ )) and sulphate  
125 assimilation and cysteine biosynthesis ( $p \leq 0.01$ ). Several regulatory pathways were also  
126 enriched, including protein phosphatases ( $p \leq 0.02$ ) and cellular response to DNA damage  
127 stimulus ( $p \leq 0.02$ ). Below we describe the details of the significantly enriched upregulated  
128 pathways using the Biocyc database<sup>15</sup>.

129 **Cell wall structure and integrity:** Peptidoglycans (PG), mycolic acid and arabinogalactan are  
130 major constituents of the mycobacterial cell wall and essential for bacterial survival under  
131 extreme conditions<sup>16</sup>. Genes involved in the synthesis of amino-sugar derivatives, like UDP-  
132 N-acetyl glucosamine (*glmU* (6.1), *glmS* (42.4), *mrsA* (2.69), *nagA* (5.4) and *Rv2267c* (5.3)),  
133 encoding a key metabolite and starting point for peptidoglycan synthesis<sup>17</sup> were found to be  
134 overexpressed. Also, there was significant upregulation of genes involved in the formation of

135 the mAGP complex, including (*glfT2* (90.5), *embB* (11.9), *Ag85c* (23.7), *ubiA* (6.9), *Rv3807c*  
136 (9.3), *wecA* (3.6), *Rv2361c* (13.2), *Rv3468c* (6.2), *aftC* (2.14), *prxA* (14.08), *galE1*(6.2) and  
137 *galE3* (3.8) etc). Additionally, the genes *Rv2174*, *Rv2181*, *pimB* and *Rv3631*, which encode  
138 enzymes involved in biosynthesis of membrane glycolipids, like lipomannan (LM)/  
139 lipoarabinomannan (LAM), a major component in TB immune-pathogenesis, were also found  
140 to be upregulated. In addition, genes involved in the synthesis of phthiocerol-based lipids (cord  
141 factors) and glycolipids (*Rv2957*, *Rv2958c* and *Rv2962c*) were also upregulated. Two genes  
142 (*otsA*, *otsB2*), encoding enzymes involved in the synthesis of trehalose, a major structural  
143 constituent of cell wall glycolipids, were also found to be upregulated (Table S4).

144 **Amino acid biosynthesis:** Numerous genes of the amino acid biosynthetic pathways, including  
145 serine, glycine, cysteine and arginine, were induced in this study. Serine is an essential amino  
146 acid for mycobacterial growth<sup>18</sup> and serves as a precursor for the synthesis of glycine, cysteine  
147 and phospholipids<sup>19</sup>. We observed significant induction of the genes *serB2* and *serA2*, which  
148 encode enzymes involved in serine biosynthesis. The gene *glyA2*, encoding serine hydroxyl  
149 methyl transferase, which converts serine to glycine, was also significantly upregulated.  
150 Furthermore, *M. tuberculosis* in bone lesions showed increased expression of the genes  
151 involved in sulphur accumulation and biosynthesis of cysteine, including *cys A1*, encoding a  
152 subunit of the sulphate transporter, and *cysN*, which encodes a subunit of ATP sulfurylase  
153 responsible for activating the imported sulphate to adenosine-5'- phosphosulfate (APS). The  
154 APS can further be used for sulfation of biomolecules or for the synthesis of reduced sulphur  
155 compounds, such as cysteine, which can be converted to methionine and mycothiol. Among  
156 the cysteine synthesis genes required to reduce APS to cysteine, the gene *cysK*, which encodes  
157 for O-acetylserine sulfhydrylase, was also upregulated. This gene codes for one of the enzymes  
158 required to condense sulphide with O-acetyl serine. As described above, several genes involved  
159 in the biosynthesis of serine, which forms the intermediate O-acetyl serine for cysteine

160 synthesis, were also upregulated. In addition to serine, glycine and cysteine biosynthesis,  
161 multiple genes involved in the *de novo* arginine biosynthesis pathway (*argC*, *argD*, *argG*, *carB*  
162 and *carA*) were also upregulated in *M. tuberculosis* within human bone lesions (Table S3).  
163 Arginine biosynthesis is also an essential pathway and has been reported to be upregulated in  
164 response to oxidative stress in *M. tuberculosis*<sup>20</sup> and also arginine deprivation cause  
165 mycobacterial cell death<sup>21</sup>.

166 **Protein phosphatases (Regulators of cell processes and virulence):** Serine/threonine  
167 phosphatases are essential signalling enzymes in bacteria that catalyze the hydrolysis of some  
168 phospho-substrates which further control cell cycle events and intracellular survival of the  
169 bacteria<sup>22</sup>. Several genes encoding for enzymes possessing phosphatase activity (*PstP*,  
170 *Rv1364c*, *gpgP*, *pknG*, *Rv3807*, *Rv3376*, *Rv3813* and *Rv1225c*) were found to be upregulated  
171 in this study. Among them, *pstP*, a key regulator of phosphorylation and cell division<sup>23</sup> and  
172 *pknG*, which senses the availability of amino acids under nutrient deprived conditions<sup>24</sup> were  
173 also upregulated in bone TB lesions. In addition to these, genes encoding acid phosphatases  
174 (*Rv2577* and *Rv2135c*) were also found to be upregulated in the current study.

175 **DNA damage response:** Intracellular pathogens, such as *M. tuberculosis*, experience a variety  
176 of DNA-damaging assaults in vivo, including the oxidative burst and host responses to  
177 infection<sup>25</sup>. Bacteria counteract these effects by inducing SOS and DNA damage repair  
178 responses. In the present study, various genes encoding proteins involved in response to DNA  
179 damage (*priA*, *disA*, *dinG*, *mutT3*, *radA*, *recN*, *recC*, *recD*, *Rv0336*, *Rv0515* and *Rv3201c*) were  
180 upregulated. Additionally, genes involved in base excision repair, along with various DNA  
181 glycosylase enzymes to remove an altered base at the site of damage, endonucleases,  
182 polymerases and DNA ligase-encoding genes (*mutY*, *udgB*, *ung*, *Rv2191*, *ligD*, *dnaZX* and  
183 *Rv0142*) were also found to be upregulated.



184 Overall, these findings indicate that stressed mycobacteria within bone abscesses maintain their  
185 overall cellular integrity by synthesizing essential amino acids, strengthening their cell wall  
186 and repairing damaged DNA to withstand these detrimental effects.

187 **Downregulated pathways:** The major pathways that were significantly enriched among the  
188 downregulated DEGs were protein metabolic processes, constituents of ribosomes, peptide  
189 biosynthesis and translational machinery ( $p \leq 0.001$ ). Along with these, various other pathways,  
190 like cellular metabolic processes, organic substance biosynthesis ( $p \leq 0.005$ ) and response to  
191 decreased oxygen level ( $p \leq 0.01$ ) were negatively enriched, as mentioned in Table S5. The  
192 details of the major pathways and gene clusters are described below.

193 **Translational machinery:** Major downregulation of cellular protein metabolic processes,  
194 including structural constituents of ribosomes (*rpl*, *rpm* and *rps*), ribonucleoprotein complex,  
195 peptide biosynthetic processes (*valS*, *trpS*, *metS*, *lysS*, *ileS*, *glyS*, *cysS1* and *alaS*) and  
196 translational initiation and elongation factors (*rimP*, *frr*, *prfA*, *infB*, *infC*, *tsf*, *efp*, *tuf*, *typA*, *ideR*  
197 and *fusA1*), was observed in the current study. Seventeen out of 22 *rps* genes (encoding the  
198 30S ribosomal subunit) and 27 of 36 *rpl* and *rpm* genes encoding the 50S ribosomal subunit  
199 were downregulated (Table S4).

200 **Protein excretion system:** Along with major downregulation of the protein biosynthetic  
201 machinery, mycobacterial protein secretion systems were also downregulated in the current  
202 study. We found major downregulation of genes involved in type VII secretion systems,  
203 including *espl*, *espD*, *espA*, *espB*, *espC*, *espD*, *eccCa1*, *eccB1*, *esxA* and *esxB*. Additionally, 4  
204 of the 8 *sec* genes (*secA1*, *secD*, *secE1* and *secF*) of the Sec secretion system and 1 of 4 *tat*  
205 genes (*tatA*), the twin-arginine (Tat) secretion system<sup>9</sup> were downregulated (Table S5).

206 **Mycobacterial growth:** Several genes associated with *M. tuberculosis* cell division, including  
207 *ftsE*, *ftsH*, *ftsW*, *ftsX*, *ftsY* and *ftsZ*, encoding for septation-associated components of

208 mycobacteria<sup>26,27</sup> were significantly downregulated. Moreover, as shown in Table S5, 6 out of  
209 a total of 11 serine/threonine protein kinases (*pknA*, *pknB*, *pknD*, *pknE*, *pknI* and *pknL*), which  
210 are known to serve as environmental sensors regulating host-pathogen interactions and cell  
211 growth<sup>28</sup> were found to be downregulated in this study. Additionally, we observed  
212 downregulation of 6 out of 7 *whiB* genes (*whiB1*, *whiB2*, *whiB3*, *whiB4*, *whiB6* and *whiB7*),  
213 transcriptional regulators suggestive of its role in mycobacterial growth and persistence<sup>29</sup>.

214 **Respiratory machinery and ATP synthesis:** Genes encoding several metabolic pathways  
215 associated with the growth of bacteria were found to be downregulated, including those  
216 involved in the *M. tuberculosis* respiratory pathway and energy generation. There was  
217 downregulation of genes coding for 6 subunits of NDH-I (*nuoA*, *nuoF*, *nuoK*, *nuoL*, *nuoM* and  
218 *nuoN*), cytochrome c oxidase (*ctaB*, *cta E*, *cta C* and *cta D*), cytochrome c reductase (*qcrA* and  
219 *qcrB*) which are involved in the routine respiratory pathway, as well as *ndhA* and *narGHJI*,  
220 which are involved in the alternative pathway of respiration. Also, there was downregulation  
221 of 4/8 subunits of genes encoding components of ATP synthase (*atpD*, *atpE*, *atpG* and *atpH*).

222 **Cellular biosynthetic pathways:** Cellular metabolism determines the fate of bacilli at the site  
223 of infection<sup>30</sup>. In this study, various biosynthetic pathways were repressed. Genes encoding  
224 cellular biosynthetic processes, like fatty acid biosynthesis (*kasA*, *kasB*, *accA*, *aacD1*, *accD5*,  
225 *accD6* and 20/34 total *fadD* genes), *de novo* synthesis of purines (*purA*, *purB*, *ndkA*, *nrdZ*,  
226 *nrdF1*, *nrdF2*, *guaA*, *guaB1*, *guaB3* and *guaB2*), NAD biosynthesis (*nadA*, *nadB*, *nadE*, *nadD*,  
227 *gpm2*, *nudC*, *pncA* and *pncB2*), and biosynthesis of branched chain amino acids (*ilvA*, *ilvB1*,  
228 *ilvN*, *ilvB2*, *ilvC*, *ilvE*, *ilvD*, *leuD*, *leuA* and *leuB*) were downregulated. Along with these  
229 pathways, genes encoding proteins involved in maintaining the redox balance in mycobacteria  
230 were also downregulated. These included the genes encoding factors for the synthesis of:  
231 mycofactocin (*mftB*, *mftC*, *mftD*, *mftE* and *mftF*), a redox cofactor in mycobacteria; mycothiol  
232 biosynthesis (*mshA*, *mshB* and *mshD*), a glutathione analogue in mycobacteria; riboflavin

233 (*ribA1*, *ribH*, *ribC* and *ribF*), a cofactor in redox system; and thioredoxin reductase (*trxB2*),  
234 which reduces thioredoxin, a redox protein. In addition, genes encoding NAD(P)  
235 transhydrogenases (*pntAa*, *pntAb* and *pntB*), which catalyzes the interconversion of NAD and  
236 NADP redox reaction, were also downregulated in the present study (Table S4).

237 **Response to hypoxia:** Mycobacteria may encounter different types of stress during host  
238 infection, including hypoxia within necrotic granulomas<sup>31</sup>. In order to survive such stresses, *M.*  
239 *tuberculosis* upregulates various genes. Interestingly, the vast majority of these hypoxia  
240 regulated genes (e.g., *devR*, *devS*, *groEL*, *groES*, *sigB*, *sigF* and *icl*) were found to be  
241 downregulated in bone TB lesions (Table S4).

242 Overall, our data reveal that there is downregulation of major metabolic processes  
243 essential for bacterial replication and growth, suggesting that *M. tuberculosis* enters a state of  
244 quiescence and reduced metabolism characterized by cell wall remodelling during chronic of  
245 infection within bone abscesses/necrotic tissue.

#### 246 **qRT-PCR validation of microarray data**

247 A small subset of genes (n=7) were randomly selected from microarray analysis which were  
248 further validated through qRT-PCR using the RNA isolated from the bone TB specimens. Out  
249 of the seven selected mycobacterial genes for validation, the gene expression of six DEGs was  
250 confirmed. Four of the genes (*Rv1230c*, *Rv2290* *Rv1910c* and *Rv1971*) showed significant  
251 upregulation; *Rv3875* showed downregulation and *Rv1586* showed no change in the expression  
252 pattern similar to microarray (Fig. 1d). However, *Rv0986* was found to be upregulated by qRT-  
253 PCR with ( $\log_2$  FC= 1.59±0.58) in contrast to the microarray analysis ( $\log_2$ FC= -2.9), where it  
254 was downregulated.

#### 255 **In-silico prediction of virulence factors**

256 Seventeen of the mycobacterial genes showing >100-fold upregulation were further screened  
 257 for identification of potential virulence factors with a significant role in bone TB pathogenesis.

| S.No. | Rv ID           | Virulent Pred                |                             |                                  |                                 |                                          |                               |               | VICMPred     |                         |
|-------|-----------------|------------------------------|-----------------------------|----------------------------------|---------------------------------|------------------------------------------|-------------------------------|---------------|--------------|-------------------------|
|       |                 | Amino acid Composition based | Dipeptide Composition Based | Similarity-Based using PSI-BLAST | PSI-BLAST created PSSM Profiles | Higher order Dipeptide Composition Based | Cascade of SVMs and PSI-BLAST | Virulent pred |              |                         |
| 1     | <b>Rv1046c</b>  | Yes                          | Yes                         | No hits                          | Yes                             | Yes                                      | Yes                           | Yes           | Virulent     | Metabolism Molecule     |
| 2     | <b>*Rv1230c</b> | Yes                          | Yes                         | Yes                              | No                              | No                                       | Yes                           | Yes           | Virulent     | Cellular process        |
| 3     | Rv3086          | No                           | No                          | Yes                              | No                              | No                                       | No                            | No            | Non-Virulent | Metabolism Molecule     |
| 4     | Rv2793c         | No                           | No                          | No hits                          | No                              | No                                       | No                            | No            | Non-Virulent | Metabolism Molecule     |
| 5     | Rv0775          | No                           | Yes                         | No hits                          | No                              | Yes                                      | Yes                           | No            | Non Virulent | Information and storage |
| 6     | Rv2844          | No                           | No                          | No hits                          | No                              | No                                       | No                            | No            | Non-Virulent | Cellular process        |
| 7     | <b>Rv3663c</b>  | Yes                          | Yes                         | Yes                              | Yes                             | No                                       | No                            | No            | Virulent     | Metabolism Molecule     |
| 8     | Rv2917          | No                           | No                          | No hits                          | No                              | No                                       | No                            | No            | Non-Virulent | Metabolism Molecule     |
| 9     | <b>Rv2490c</b>  | Yes                          | Yes                         | Yes                              | Yes                             | Yes                                      | Yes                           | Yes           | Virulent     | Information and storage |
| 10    | <b>*Rv1441c</b> | Yes                          | Yes                         | Yes                              | Yes                             | Yes                                      | Yes                           | Yes           | Virulent     | Information and storage |
| 11    | Rv3721c         | No                           | Yes                         | Yes                              | No                              | No                                       | No                            | No            | Non-Virulent | Information and storage |
| 12    | Rv2414c         | No                           | No                          | No hits                          | No                              | No                                       | No                            | No            | Non-Virulent | Metabolism Molecule     |
| 13    | Rv2736c         | No                           | No                          | Yes                              | No                              | No                                       | No                            | No            | Non-Virulent | Cellular process        |
| 14    | <b>*Rv2672</b>  | No                           | No                          | No hits                          | No                              | No                                       | No                            | No            | Non-Virulent | Cellular process        |
| 15    | Rv3194c         | No                           | No                          | Yes                              | No                              | No                                       | No                            | No            | Non-Virulent | Metabolism Molecule     |
| 16    | Rv3667          | No                           | No                          | Yes                              | No                              | No                                       | No                            | No            | Non Virulent | Cellular process        |
| 17    | Rv3500c         | No                           | No                          | No                               | No                              | No                                       | No                            | No            | Non-Virulent | Cellular process        |

**Table 2:** Screening of mycobacterial virulence proteins encoded by genes amongst the top upregulated genes (FC>100) using Virulent Pred and VICM Pred. Proteins possessing virulence potential based on a minimum four features are highlighted in red color.

258 Candidate virulence proteins were identified using Virulent Pred and VICM Pred. Five proteins  
 259 were identified possessing virulence-like properties based on their amino acid composition,  
 260 dipeptide composition, and PSI-BLAST and PSSM profiles. Two of the top upregulated genes,  
 261 *Rv1046c* (conserved hypothetical protein) and *Rv1230c* (membrane protein), with log<sub>2</sub>fold  
 262 changed of 9.7 and 9.1, respectively, along with *Rv3663c*, a dipeptide transporter (*DppD*), and  
 263 two PE\_PGRS family proteins, *Rv1441c* (*PE\_PGRS26*) and *Rv2490c* (*PE\_PGRS43*), were  
 264 predicted to be virulence factors by *in silico* analysis (Table 2).

## 265 Confirmation of virulence gene expression in an in vitro model of bone TB

266 **In vitro model of bone TB:** In order to confirm the role of the in vivo expressed mycobacterial  
267 virulence genes in the pathogenesis of bone TB, an in vitro osteoblast cell line model was  
268 established by infecting the cells using *M. tuberculosis* H37Rv-lux (Fig. S1). *M. tuberculosis*  
269 established infection in osteoblasts, followed by an exponential increase in the bacterial burden  
270 up to 21 days post-infection (Fig 3a). Osteoblast proliferation and alkaline phosphatase (ALP)  
271 activity was significantly decreased upon *M. tuberculosis* infection when compared to  
272 uninfected control cells at days 3 ( $p \leq 0.01$ ), 7 ( $p \leq 0.05$ ), 14 ( $p \leq 0.001$ ) and 21 ( $p \leq 0.05$ ) post-  
273 infection, as shown in Fig. S1.

274 **Gene expression analysis of mycobacterial virulence proteins in osteoblast cell culture:**  
275 Gene expression profiling of virulence genes found to be upregulated in the in vivo bone TB  
276 lesions were further validated in the in vitro osteoblast model of bone TB using qRT-PCR. The  
277 gene *Rv1046c* showed significant upregulation at days 7 and 14 post-infection (p-value,  
278  $\leq 0.001$ ), but was found to be downregulated by day 21 post-infection. *Rv1441c* showed  
279 significant downregulation at day 7 post-infection, although its expression increased afterwards  
280 and showed significant upregulation (p-value,  $\leq 0.001$ ) at days 14 and 21 post-infection. The  
281 gene *Rv3663* showed a significant time-dependent increase in gene expression post-infection  
282 as shown in Fig. 3b.

## 283 **Discussion**

284 Bone is a highly mineralized tissue composed of bone-forming osteoblasts, bone degrading  
285 osteoclasts, osteocytes and extracellular matrix (ECM). Bone extracellular matrix (BEM)  
286 constitutes 30% of organic component majorly collagenous protein along with non-collagenous  
287 proteins and glycans; 70% of bone is made up of inorganic component (hydroxyapatite). BEM  
288 associated proteins play a key role in establishing infection through adherence, penetration and  
289 colonization by a pathogen within the bone. Many of the proteins such as collagen, bone

290 sialoprotein, osteopontin and fibronectin are reported to be perfect niche for pathogens in the  
291 bone<sup>32</sup>. Bone TB primarily occurs through the dissemination of *M. tuberculosis* bacilli from  
292 the respiratory tract to the bones<sup>33</sup>. Enhanced bone resorption and bone loss are characteristic  
293 features of bone TB as a result of abnormal activation of osteoclasts<sup>6,7,34</sup>.

294 Although *M. tuberculosis* is known to cause bone TB, the cellular hosts for  
295 mycobacteria within the bone environment are still not well understood. Sarkar et al.  
296 demonstrated the replication of various mycobacterial strains in osteoblast cells<sup>35</sup>. Osteoblasts  
297 have also been shown to be host cells for *M. bovis* BCG infection<sup>36</sup>. As an intracellular  
298 pathogen, *M. tuberculosis* not only needs to survive in the host environment but also to replicate  
299 within human cells to disseminate. In order to establish infection in different tissues, *M.*  
300 *tuberculosis* is known to adapt by altering its transcriptional program in different  
301 environments<sup>9,12</sup>. To gain insight into the pathogenesis of bone TB, it is thus important to  
302 characterize the *M. tuberculosis* transcriptome in the bone microenvironment, particularly at  
303 the site of active disease. In the present study, we performed in vivo transcriptomic analysis of  
304 tubercle bacilli within abscesses or necrotic tissue obtained from patients with  
305 microbiologically-confirmed bone TB.

306 Overall, among DEGs, a greater number of genes were downregulated than were  
307 upregulated, corresponding to several metabolic pathways. Major significantly enriched  
308 upregulated pathways in human TB bone lesions were those involved in maintaining structural  
309 integrity and survival of the bacteria, including the synthesis of mAGP, LAM and glycolipids,  
310 which form the core structure of mycobacterial cell wall and are essential for *M. tuberculosis*  
311 resistance to various external stresses and reduced permeability to many drugs<sup>37,38</sup>. Likewise,  
312 two of the genes (*otsA* and *otsB2*) coding for trehalose synthesis and its transporter *mmpL13ab*  
313 were also significantly upregulated in this study. Induction of trehalose synthesis has been

314 implicated in *M. tuberculosis* virulence, as it can be used as carbon and energy source during  
315 various stresses<sup>39,40</sup>.

316 In the current study, enrichment of several biosynthetic pathways of essential amino  
317 acids, including serine, arginine and cysteine, was observed. Serine biosynthesis is crucial for  
318 survival of mycobacteria inside the human host, as this amino acid is not taken up from the  
319 surrounding environment<sup>41</sup>. Besides acting as a nitrogen source, it is also important for the  
320 synthesis of other amino acids, such as glycine and cysteine. *De novo* synthesis of arginine is  
321 known to have a significant role in *M. tuberculosis* virulence, as arginine deprivation leads to  
322 accumulation of DNA damage, causing cell death<sup>20,21</sup>. The enzymes involved in this pathway  
323 are being considered as drug targets for TB therapeutics<sup>42</sup>. Thus, *M. tuberculosis* may  
324 upregulate genes involved in amino acid metabolism as a survival and/or pathogenesis strategy  
325 inside bone. Additionally, assimilation of inorganic nutrients, such as sulphur, in mycobacteria  
326 has been shown to contribute to mycobacterial virulence and survival<sup>43</sup>.

327 Mycobacterial protein phosphatases were also enriched in our study. *PstP* is an essential  
328 gene for *M. tuberculosis* intracellular survival and a key regulator of cell growth. Deletion of  
329 *pstP* causes cell wall defects leading to cell death, while overexpression of *pstP* lead to  
330 elongated cells with compromised cell survival<sup>44</sup>. We observed upregulation of *pknG*, which  
331 encodes an essential serine/threonine kinase responsible for sensing and responding to changes  
332 in nutrient availability<sup>24</sup>. Thus, the upregulated expression of these two regulatory genes, *pstP*  
333 and *pknG*, within bony TB lesions may be essential for metabolic switching from active growth  
334 to stasis in order to cope with environmental stresses. Along with these, mycobacterial genes  
335 encoding acid phosphatases enzymes (*Rv2577* and *Rv2135c*) were also found to be upregulated.  
336 Acid phosphatases secreted from osteoclast cells are considered a key marker of bone  
337 resorption, as they dissolve both organic (collagen) and inorganic (calcium and phosphorus)  
338 components of bone<sup>45</sup>. *Rv2577*, which encodes a secreted acid phosphatase<sup>46,47</sup> containing a

339 TAT (twin arginine translocation) motif was also found to be overexpressed, suggesting a  
340 potential role in bone resorption. Additionally, several genes (*mce1A*, *Rv3717*, *glmU* and  
341 *Rv0296c*) considered important for invasion of mycobacteria into host tissues were also  
342 induced in the present study.

343 One mechanism by which the host immune system responds to invading pathogens is  
344 the generation of various reactive oxygen species and reactive nitrogen intermediates, which  
345 cause damage to mycobacterial DNA<sup>25</sup>. Bacteria respond to such assaults by inducing DNA  
346 damage repair responses. In the present study, *M. tuberculosis* in bone lesions overexpressed  
347 genes involved in recombination repair systems (*recC*, *recD*, *recN* and *mutT3*) and base  
348 excision repair (*udgB*, *ung*, *Rv2191*, *dnaZX* and *ligD*). Induction of mycobacterial DNA  
349 damage repair responses promotes mycobacterial survival through adaptations to  
350 environmental stress and regulation of virulence<sup>48</sup>.

351 Amongst the negatively enriched pathways corresponding to downregulated genes in  
352 the study, major downregulation was observed in genes associated with cellular protein  
353 metabolism, growth of mycobacteria and several cellular biosynthetic processes. The bacteria  
354 surviving in bony lesions showed downregulation of ribosomal proteins involved in protein  
355 synthesis, which was accompanied by decreased protein export, as evidenced by  
356 downregulation of genes of mycobacterial secretion systems including *sec*, *tat* and several of  
357 the type VII secretion systems. The downregulation of *esxA* and *cfp10* from the Esx-1 secretion  
358 system is notable since the proteins encoded by these genes are considered important virulence  
359 factors of mycobacteria<sup>49,50</sup>. Other genes encoding Esat-6-like proteins were also  
360 downregulated in current study. The observed reduction in protein biosynthesis was  
361 accompanied by a downregulation of most genes encoding heat shock proteins, which are  
362 involved in proper protein folding during stress conditions.



363 Several metabolic pathways essential for mycobacterial growth were found to be  
364 downregulated in bone TB lesions. For example, the majority of purine biosynthesis genes,  
365 which are essential for *M. tuberculosis* growth<sup>51,52</sup> were among the downregulated DEGs in the  
366 current study. As *M. tuberculosis* infection progresses from the acute to the chronic phase,  
367 immune activation and host-imposed stresses increase, which causes a metabolic shift in  
368 mycobacteria to ensure maintenance of membrane integrity in the absence of growth<sup>30,53</sup>. The  
369 genes involved in the synthesis of redox cofactors, such as NAD, mycofactocin, mycothiol,  
370 and riboflavin, which are important to resist oxidative stresses, were also found to be  
371 downregulated. Besides maintaining redox homeostasis, actively growing bacteria also needs  
372 energy in the form of ATP, which is synthesized by ATP synthase in response to the proton  
373 motive force generated through the respiratory chain. In the current study, the components of  
374 both the routine and alternative respiratory pathways, along with ATP synthase, were  
375 downregulated, thus indicating a low energy state of *M. tuberculosis* in the bone.

376 Furthermore, mycobacteria may come across different types of stresses during host  
377 infection, including hypoxia within necrotic granulomas and acidic pH in phagosomes<sup>31</sup>. In  
378 order to survive such stresses, *M. tuberculosis* upregulates various genes. A study by Rustad et  
379 al. has identified 49 genes, which are upregulated during *M. tuberculosis* exposure to hypoxia  
380 in vitro<sup>13</sup>. Interestingly, the great majority (40/49) of these hypoxia-regulated genes were found  
381 to be downregulated during bone TB. Another group of genes, which are upregulated during  
382 oxygen deprivation, include the universal stress response genes. Seven of 9 of these genes were  
383 downregulated in the current study. We also observed downregulation of 7/10 genes encoding  
384 heat shock proteins responsible for proper protein folding during stress conditions<sup>54</sup>.  
385 Downregulation of genes related to hypoxia and universal stress proteins points toward the  
386 diverse microenvironments encountered by mycobacteria within the lung parenchyma and  
387 bone. Thus, *M. tuberculosis* in bone lesions seems to be in a non-hypoxic, quiescent, low-

388 energy state characterized by downregulation of genes involved in protein synthesis and  
389 transport, purine synthesis, and redox homeostasis.

390 After validating the microarray results using quantitative RT-PCR, the genes found to  
391 be the most highly upregulated in bone TB were further screened for the presence of *M.*  
392 *tuberculosis* virulence genes, with the hypothesis that these genes may play a significant role  
393 in the pathogenesis of bone TB. The bioinformatic tools VirulentPred and VICMPred, which  
394 have been used previously for such analyses<sup>55,56</sup> identified several key virulence factors  
395 (Rv1046c, Rv1230c, dppD (Rv3663), PE\_PGRS26 (Rv1440c) and PE\_PGRS43 (Rv2490c)),  
396 which may play a role in *M. tuberculosis* pathogenesis and modulating host environment within  
397 the bone. Rv1046c is a hypothetical protein with unknown function belonging to a pathogenic  
398 genomic island (Rv1040c-Rv1046) with mobile genetic elements<sup>57</sup>, and *Rv1046c*-deficient  
399 mutants have been shown to have growth defects<sup>52</sup>. Rv1230c acts as cAMP-responsive stress  
400 regulator<sup>58</sup>. Rv3663, an oligopeptide/ dipetide permease (Opp)/Dpp transport system is  
401 involved in cell surface modulation of *M. tuberculosis*<sup>59</sup>. Expression of the Dpp transporters  
402 DppC and DppD in TB bone lesions could be important under nutrient-deficient conditions for  
403 the uptake of peptides<sup>60</sup> from the extracellular matrix. Structural homology analysis showed  
404 that PE\_PGRS 26 (Rv1441c) is an apoptosome-like protein associated with increased  
405 persistence of mycobacteria in mice and increased cell death and LDH release in  
406 macrophages<sup>61</sup>. Another PE-PGRS family of protein, Rv2490c has been shown to be expressed  
407 by *M. tuberculosis* in the lungs of guinea pig 30 and 90 days post-infection<sup>62</sup>.

408 Osteoblasts play a significant role and are key regulator in maintaining bone  
409 homeostasis. To study the importance of mycobacterial virulence proteins predicted in the  
410 present study in the pathogenesis of disease, an in vitro osteoblast cell line model was  
411 established with minor modifications from previous models<sup>35,36</sup>. Osteoblast cells were infected  
412 with *M. tuberculosis* H37Rv-lux in osteogenesis media for 21 days to allow the maturation of

413 pre-osteoblasts to mature osteoblasts secreting extracellular matrix and minerals around  
414 osteoblasts<sup>63</sup>. The mycobacteria invaded the osteoblasts and multiplied exponentially, as  
415 determined in real time by relative luminescence intensity. Using RT-PCR in this model, we  
416 confirmed upregulation of bioinformatics-derived *M. tuberculosis* virulence genes, which were  
417 also found to be upregulated in human bone TB lesions, suggesting that the encoded proteins  
418 may play a role in the pathogenesis of bone TB.

### 419 **Concluding Remarks**

420 The present study provides novel insights into mycobacterial adaptation in the bone  
421 microenvironment. Within human bone TB lesions during the chronic stage of infection, *M.*  
422 *tuberculosis* seems to be in a non-hypoxic, non-replicative and hypo-metabolic state  
423 characterized by alterations in its physiology, as reflected by decreased protein metabolism,  
424 export and cellular biosynthetic processes. In parallel, there is a major remodelling of cell wall  
425 synthesis favoring the maintenance of cellular integrity for bacillary survival within abscesses.  
426 Hence, it appears that after establishing a chronic infection within the bone, *M. tuberculosis*  
427 undergoes a transition from active growth to a metabolically quiescent state. These unique  
428 metabolic adaptations of mycobacteria during the chronic stage of infection can be further  
429 explored to gain an insight into mycobacterial pathogenesis and may lead to the development  
430 of novel therapeutic targets for the treatment of bone TB.

### 431 **Materials and Methods**

432 **Study subjects and sample collection:** To study the transcriptome of mycobacteria at the site  
433 of infection, abscess/necrotic tissue samples were used. Specimen were taken by an  
434 orthopaedic surgeon and collected in a sterile container from microbiologically confirmed (4  
435 cases positive by GeneXpert MTB/RIF and MGIT culture and 1 case positive only by MGIT  
436 culture) bone TB patients before the commencement of anti-tubercular treatment (ATT).

437 Samples were collected only after obtaining the informed written consent from the patients  
438 visiting the Department of Orthopaedics, Post Graduate Institute of Medical Education and  
439 Research (PGIMER) in Chandigarh, India. The study was approved by the Institutional Ethics  
440 Committee vide no. PGI/IEC/2012/1334-35 and INT/IEC/2018/000126. The necrotic  
441 tissue/abscess samples were collected and immediately put into ice and then transferred to RNA  
442 later (Sigma Aldrich) and stored at  $-80^{\circ}\text{C}$  till further use.

443 **Bacterial culture:** *M. tuberculosis* H37Rv, a laboratory strain originally obtained from NCTC  
444 London, was grown in vitro in Sauton's media supplemented with 10% OADC. A  
445 bioluminescent *M. tuberculosis* H37Rv strain (*M. tuberculosis-lux*), which stably expresses an  
446 integrated bioluminescent reporter (firefly *luxABCDE* full operon), including the luciferase  
447 enzyme and associated luciferin substrate (Dutta et al., 2020), was used for infection of  
448 osteoblast cells. *M. tuberculosis-lux* was grown in Middlebrook 7H9 broth containing  
449 0.05% Tween, 0.2% glycerol and 10% OADC in a shaking incubator at  $37^{\circ}\text{C}$  and 200rpm.

450 **Cell line:** The MC3T3 osteoblast cell line (ATCC CRL-2593) was used to establish an in vitro  
451 cell line model of bone TB. Osteoblast cells were maintained in  $\alpha$ -MEM (Gibco) media  
452 containing 10% FBS (FBS; Corning) at  $37^{\circ}\text{C}$  in the presence of 5%  $\text{CO}_2$ .

453 **RNA isolation:** For isolation of *M. tuberculosis* RNA, stored samples were thawed on ice and  
454 centrifuged at 4500g for 15 minutes to remove RNA later followed by two times of washing  
455 using chilled phosphate buffered saline (PBS). Further, the pellet obtained was treated with  
456 GTC solution (4M guanidium thiocyanate, 0.5% sarkosyl, 25mM tri sodium citrate, 0.1M  $\beta$ -  
457 mercaptoethanol and 0.5% Tween-80) for 5-10 minutes for effective removal of eukaryotic  
458 RNA, followed by centrifugation at 5000g for 20 minutes at  $4^{\circ}\text{C}$  and RNA was isolated using  
459 TRIzol reagent (Life Technologies), as described previously by Abhishek et al.<sup>10</sup>. RNA isolated  
460 from mid-logarithmic phase H37Rv culture was used as a reference to estimate the  
461 differentially expressed genes in bone TB specimens. Quality and quantity of RNA was

462 determined using 2100 Bioanalyzer (Agilent) and Infinite 200 Pro NanoQuant (Tecan)  
463 respectively.

464 **Microarray:** For microarray analysis, amplification and cyanine 3-CTP (Cy3) labelling of *M.*  
465 *tuberculosis* RNA was accomplished using One-Color Microarray-Based Low Input Quick  
466 Amp WT Labelling kit (Agilent Technologies) as per the manufacturer's protocol using 300ng  
467 of input RNA. Further, labelled and amplified cRNA samples were purified using RNeasy Mini  
468 kit and quantified using Infinite 200 Pro Nano Quant plate spectrophotometer. cRNA  
469 concentration (ng/ $\mu$ L), 260/280 ratio and Cy3 concentration (pmol/ $\mu$ L) were measured to  
470 estimate the yield and specific activity of each sample. The samples (n=5) with a specific  
471 activity of more than 15 (pmol Cy3/ $\mu$ g cRNA) and yield of 0.825 $\mu$ g were selected and further  
472 processed for hybridization to customised *M. tuberculosis* array slides (custom GE array  
473 8\*15K; Agilent technologies G2509F-026323). 1.0  $\mu$ g of labelled cRNA from each sample and  
474 control were used for co-hybridization using the gene expression hybridization kit (Agilent) as  
475 per the manufacturer's protocol. The hybridized slides were washed and scanned using Sure  
476 Scan Microarray scanner (Agilent).

477 **Data extraction and analysis:** Data were extracted from the scanned tiff image for each  
478 sample using feature extraction software and analysed using Gene Spring GX software  
479 (Agilent). For statistical analysis, student's t-test was used with Benjamini-Hochberg's  
480 correction. The genes with expression of  $>2$  or  $\leq -2$  fold change and  $p$ -value  $\leq 0.05$  were filtered  
481 and considered to be significantly differentially expressed genes (DEGs). DEGs were subjected  
482 to functional categorization as per their functional categories listed in Tuberculist. Further,  
483 hypergeometric probability was used to find significantly enriched functional categories ( $p$ -  
484 value  $\leq 0.05$ ). Pathway enrichment analysis was done through Biocyc database ([BioCyc.org](#))  
485 using fisher's exact with Benjamini-Hochberg's post hoc test.

486 **Validation of microarray results using real time qRT-PCR:** Validation of microarray data  
487 was done using qRT-PCR. The RNA isolated from the clinical specimen from patients with  
488 confirmed bone TB was subjected to DnaseI (Thermo) treatment, followed by cDNA synthesis  
489 (BioRad iScript). The qRT-PCR was performed using Sybr Green master mix (Biorad) on the  
490 Rotor gene Q instrument (Qiagen). Relative gene expression of all the genes were calculated  
491 with the  $2^{(-\Delta\Delta CT)}$  method, using 16S rRNA as an internal control and in vitro grown *M.*  
492 *tuberculosis* as reference. Primer sets used for relative gene expression are listed in the  
493 supplementary table (Table S1).

494 **Prediction of *M. tuberculosis* virulence proteins:** Highly expressed genes with >100-fold  
495 upregulation were screened for prediction of genes encoding potential virulence proteins in  
496 bone TB. VICM Pred and Virulent Pred support vector machine (SVM)-based tools were used  
497 for prediction<sup>55,56</sup>.

#### 498 **In vitro model of bone TB:**

499 Osteoblast cells were cultured in 24-well plates at a density of  $5 \times 10^4$  cells/well in osteogenesis  
500 media supplemented with 50 $\mu$ g/ml ascorbic acid and 2mM  $\beta$ -glycerophosphate for 24 hours at  
501 37°C in the presence of 5% CO<sub>2</sub>. After 24 hours of incubation, osteoblast cells were infected  
502 with *M. tuberculosis*-lux at a MOI of 10-15 for 2 hours. Prior to infection, single-cell  
503 suspension of log-phase grown *M. tuberculosis*-lux (OD<sub>600</sub> 0.3-0.5) was prepared followed by  
504 centrifugation, washing and vortexing in the presence of 3-mm glass beads. After 2 hours of  
505 infection, the monolayer of infected and uninfected control cells was washed thrice using PBS.  
506 Media containing amikacin (20ug/ml) was added to kill the extracellular bacteria, and then the  
507 cells were grown in amikacin-free osteogenesis media for 21 days post-infection. Culture  
508 media were changed every 2-3 days. Osteogenesis medium allows the differentiation of  
509 osteoblasts into mature osteoblast cells in the presence of mycobacteria. Cell proliferation was

510 measured using the MTS assay (Promega), ALP activity using 1-step pNPP substrate solution  
511 (Thermo Scientific) and intracellular multiplication of bacteria was measured at days 0, 3, 7,  
512 14 and 21 post-infection.

513 **Assessment of invasion and intracellular multiplication of mycobacteria:** Mycobacterial  
514 burden within osteoblasts was measured in terms of relative luminescence units (RLU)/ml. At  
515 each time point, cells from were lysed using 0.1% TritonX-100 and collected in a micro-  
516 centrifuge tube. Immediately after collection, the cell lysate was pelleted and read for RLU  
517 using a luminometer (Promega GloMax 20/20).

518 **Gene expression analysis:** qRT-PCR was used to study the relative gene expression of  
519 selected mycobacterial virulent proteins identified through microarray of bone TB patients in  
520 the intracellular *M. tuberculosis* isolated from osteoblast cell lines.

521 **Statistical analysis:** For statistical analysis, Graph Pad Prism was used and the statistical  
522 difference between two groups was computed using unpaired Student's t-test. For analysis of  
523 more than 2 groups, one-way ANOVA was used. Data were represented as mean  $\pm$  standard  
524 deviation (SD). A p-value  $\leq 0.05$  was considered statistically significant.

## 525 **Acknowledgments**

526 This work was supported by Indian Council of Medical Research (ICMR), project No.5/4-  
527 5/6/Ortho/2012-NCD-1. Training to KK arranged by Dr. Suman Laal under NIH/FIC training  
528 grant (1D43TW009588) is acknowledged. We also thank Mr. Yogesh Mittal for assistance in  
529 generating tables.

## 530 **References**

531 1. Donoghue HD, Lee OYC, Minnikin DE, Besra GS, Taylor JH, Spigelman M. Tuberculosis  
532 in Dr Granville's mummy: a molecular re-examination of the earliest known Egyptian

- 533 mummy to be scientifically examined and given a medical diagnosis. Proc R Soc B.  
534 2010;277(1678):51–6.
- 535 2. Kanade S, Nataraj G, Mehta P, Shah D. Pattern of missing probes in rifampicin resistant  
536 TB by Xpert MTB/RIF assay at a tertiary care centre in Mumbai. Indian Journal of  
537 Tuberculosis. 2019;66(1):139–43.
- 538 3. Rajasekaran S, Soundararajan DCR, Shetty AP, Kanna RM. Spinal Tuberculosis: Current  
539 Concepts. Global Spine Journal. 2018;8(4\_suppl):96S-108S.
- 540 4. Jain AK. Tuberculosis of the spine: A fresh look at an old disease. The Journal of Bone  
541 and Joint Surgery British volume. 2010;92-B(7):905–13.
- 542 5. Jain A, Rajasekaran S. Tuberculosis of the spine. Indian J Orthop. 2012;46(2):127.
- 543 6. Tsumura M, Miki M, Mizoguchi Y, Hirata O, Nishimura S, Tamaura M, et al. Enhanced  
544 osteoclastogenesis in patients with MSMD due to impaired response to IFN- $\gamma$ . Journal of  
545 Allergy and Clinical Immunology. 2021; S009167492100823X.
- 546 7. Hoshino A, Hanada S, Yamada H, Mii S, Takahashi M, Mitarai S et al. Mycobacterium  
547 tuberculosis escapes from the phagosomes of infected human osteoclasts reprograms  
548 osteoclast development via dysregulation of cytokines and chemokines. Pathogens and  
549 Disease. 2014; 70:28–39.
- 550 8. Jabir RA, Rukmana A, Saleh I and Kurniawati T. The Existence of Mycobacterium  
551 tuberculosis in Microenvironment of Bone. Mycobacterium - Research and Development,  
552 Wellman Ribón, IntechOpen. 2017. DOI: 10.5772/intechopen.69394.



- 553 9. Sharma S, Ryndak MB, Aggarwal AN, Yadav R, Sethi S, Masih S, et al. Transcriptome  
554 analysis of mycobacteria in sputum samples of pulmonary tuberculosis patients. PLOS  
555 ONE. 2017;12(3): e0173508.
- 556 10. Abhishek S, Saikia UN, Gupta A, Bansal R, Gupta V, Singh N, Laal S, Verma I.  
557 Transcriptional Profile of Mycobacterium tuberculosis in an in vitro Model of Intraocular  
558 Tuberculosis. Front Cell Infect Microbiol. 2018; 8:330.
- 559 11. Hudock TA, Foreman TW, Bandyopadhyay N, Gautam US, Veatch AV, LoBato DN, et  
560 al. Hypoxia Sensing and Persistence Genes Are Expressed during the Intragranulomatous  
561 Survival of Mycobacterium tuberculosis. Am J Respir Cell Mol Biol. 2017;56(5):637–47.
- 562 12. Rachman H, Strong M, Ulrichs T, Grode L, Schuchhardt J, Mollenkopf H, et al. Unique  
563 Transcriptome Signature of Mycobacterium tuberculosis in Pulmonary Tuberculosis.  
564 Infect Immun. 2006;74(2):1233–42.
- 565 13. Rustad TR, Harrell MI, Liao R, Sherman DR. The Enduring Hypoxic Response of  
566 Mycobacterium tuberculosis. PLoS ONE. 2018;3(1):e1502.
- 567 14. Betts JC, Lukey PT, Robb LC, McAdam RA, Duncan K. Evaluation of a nutrient starvation  
568 model of Mycobacterium tuberculosis persistence by gene and protein expression  
569 profiling: Nutrient starvation of M. tuberculosis. Molecular Microbiology.  
570 2002;43(3):717–31.
- 571 15. Karp PD, Billington R, Caspi R, Fulcher CA, Latendresse M, Kothari A, et al. The BioCyc  
572 collection of microbial genomes and metabolic pathways. Briefings in Bioinformatics.  
573 2019;20(4):1085–93.

- 574 16. Maitra A, Munshi T, Healy J, Martin LT, Vollmer W, Keep NH, et al. Cell wall  
575 peptidoglycan in *Mycobacterium tuberculosis*: An Achilles' heel for the TB-causing  
576 pathogen. *FEMS Microbiology Reviews*. 2019;43(5):548–75.
- 577 17. Soni V, Upadhyay S, Suryadevara P, Samla G, Singh A, Yogeeswari P, et al. Depletion  
578 of *M. tuberculosis* GlmU from Infected Murine Lungs Effects the Clearance of the  
579 Pathogen. *PLOS Pathogens*. 2015;11(10):e1005235.
- 580 18. Haufroid M, Wouters J. Targeting the Serine Pathway: A Promising Approach against  
581 Tuberculosis. *Pharmaceuticals (Basel)*. 2019;12(2):66.
- 582 19. Reitzer L. Amino Acid Synthesis: Reference Module in Biomedical Sciences. Elsevier;  
583 2014. p. B9780128012383025000.
- 584 20. Tiwari S, van Tonder AJ, Vilchèze C, Mendes V, Thomas SE, Malek A, et al. Arginine-  
585 deprivation–induced oxidative damage sterilizes *Mycobacterium tuberculosis*. *Proc Natl*  
586 *Acad Sci USA*. 2018;115(39):9779–84.
- 587 21. Mizrahi V, Warner DF. Death of *Mycobacterium tuberculosis* by l-arginine starvation.  
588 *Proc Natl Acad Sci USA*. 2018;115(39):9658–60.
- 589 22. Khan MZ, Kaur P, Nandicoori VK. Targeting the messengers: Serine/threonine protein  
590 kinases as potential targets for antimycobacterial drug development. *IUBMB Life*.  
591 2018;70(9):889–904.
- 592 23. Iswahyudi, Mukamolova GV, Straatman-Iwanowska AA, Allcock N, Ajuh P, Turapov O,  
593 et al. Mycobacterial phosphatase PstP regulates global serine threonine phosphorylation  
594 and cell division. *Sci Rep*. 2019;9(1):8337.

- 595 24. Rieck B, Degiacomi G, Zimmermann M, Cascioferro A, Boldrin F, Lazar-Adler NR, et al.  
596 PknG senses amino acid availability to control metabolism and virulence of  
597 *Mycobacterium tuberculosis*. *PLoS Pathog.* 2017;13(5): e1006399.
- 598 25. Vultos DT, Mestre O, Tonjum T, Gicquel B. DNA repair in *Mycobacterium tuberculosis*  
599 revisited. *FEMS Microbiol Rev.* 2009;33(3):471–87.
- 600 26. Datta P, Dasgupta A, Singh AK, Mukherjee P, Kundu M and Basu J. Interaction between  
601 FtsW and penicillin-binding protein 3 (PBP3) directs PBP3 to mid-cell, controls cell  
602 septation and mediates the formation of a trimeric complex involving FtsZ, FtsW and  
603 PBP3 in mycobacteria. *Molecular microbiology.* 2006;62: 1655-73.
- 604 27. Hett EC, Rubin EJ. Bacterial Growth and Cell Division: A Mycobacterial Perspective.  
605 *Microbiol Mol Biol Rev.* 2008;72(1):126–56.
- 606 28. Priscic S, Husson RN. *Mycobacterium tuberculosis* Serine/Threonine Protein Kinases.  
607 *Microbiol Spectr.* 2014;2(5):10. 1128/microbiolspec.MGM2-0006-2013.
- 608 29. Zheng F, Long Q, Xie J. The Function and Regulatory Network of WhiB and WhiB-Like  
609 Protein from Comparative Genomics and Systems Biology Perspectives. *Cell Biochem*  
610 *Biophys.* 2012;63(2):103–8.
- 611 30. Warner DF. *Mycobacterium tuberculosis* Metabolism. *Cold Spring Harbor Perspectives in*  
612 *Medicine.* 2015;5(4): a021121–a021121.
- 613 31. Dutta NK, Karakousis PC. Latent tuberculosis infection: myths, models, and molecular  
614 mechanisms. *Microbiol Mol Biol Rev.* 2014;78(3):343-371. doi:10.1128/MMBR.00010-  
615 14

- 616 32. Hudson MC, Ramp WK, Frankenburg KP. Staphylococcus aureus adhesion to bone matrix  
617 and bone-associated biomaterials. *FEMS Microbiology Letters*. 1999;173(2):279–84.
- 618 33. Tuli S. Tuberculosis of the skeletal system. Fifth edition. New Delhi: Jaypee Brothers  
619 Medical Publishers; 2016.
- 620 34. Liu W, Zhou J, Niu F, Pu F, Wang Z, Huang M, et al. Mycobacterium tuberculosis  
621 infection increases the number of osteoclasts and inhibits osteoclast apoptosis by  
622 regulating TNF- $\alpha$ -mediated osteoclast autophagy. *Exp Ther Med*. 2020;20(3):1889–98.
- 623 35. Sarkar S, Dlamini MG, Bhattacharya D, Ashiru OT, Sturm AW, Moodley P. Strains of  
624 Mycobacterium tuberculosis differ in affinity for human osteoblasts and alveolar cells in  
625 vitro. *SpringerPlus*. 2016;5(1):163.
- 626 36. Hotokezaka H, Kitamura A, Matsumoto S, Hanazawa S, Amano S, Yamada T.  
627 Internalization of Mycobacterium bovis Bacillus Calmette-Guérin into osteoblast-like  
628 MC3T3-E1 cells and bone resorptive responses of the cells against the infection. *Scand J*  
629 *Immunol*. 1998;47(5):453–8.
- 630 37. Angala SK, Belardinelli JM, Huc-Claustre E, Wheat WH, Jackson M. The cell envelope  
631 glycoconjugates of Mycobacterium tuberculosis. *Crit Rev Biochem Mol Biol*.  
632 2014;49(5):361–99.
- 633 38. Vincent AT, Nyongesa S, Morneau I, Reed MB, Tocheva EI, Veyrier FJ. The  
634 Mycobacterial Cell Envelope: A relict from the past or the result of recent evolution? *Front*  
635 *Microbiol*. 2018; 9:2341.
- 636 39. Thanna S, Sucheck SJ. Targeting the trehalose utilization pathways of Mycobacterium  
637 tuberculosis. *Med Chem Commun*. 2016;7(1):69–85.

- 638 40. Korte J, Alber M, Trujillo CM, Syson K, Koliwer-Brandl H, Deenen R, et al. Trehalose-  
639 6-Phosphate-Mediated Toxicity Determines Essentiality of OtsB2 in *Mycobacterium*  
640 *tuberculosis* In Vitro and in Mice. *PLOS Pathogens*. 2016;12(12):e1006043.
- 641 41. Borah K, Beyß M, Theorell A, Wu H, Basu P, Mendum TA, et al. Intracellular  
642 *Mycobacterium tuberculosis* Exploits Multiple Host Nitrogen Sources during Growth in  
643 Human Macrophages. *Cell Reports*. 2019;29(11):3580-3591.e4.
- 644 42. Mishra A, Mamidi AS, Rajmani RS, Ray A, Roy R, Surolia A. An allosteric inhibitor of  
645 *Mycobacterium tuberculosis* ArgJ: Implications to a novel combinatorial therapy. *EMBO*  
646 *Mol Med*. 2018;10(4).
- 647 43. Paritala H, Carroll KS. New Targets and Inhibitors of Mycobacterial Sulfur Metabolism.  
648 *Infect Disord Drug Targets*. 2013;13(2):85–115.
- 649 44. Sharma AK, Arora D, Singh LK, Gangwal A, Sajid A, Molle V, et al. Serine/Threonine  
650 Protein Phosphatase PstP of *Mycobacterium tuberculosis* Is Necessary for Accurate Cell  
651 Division and Survival of Pathogen. *Journal of Biological Chemistry*.  
652 2016;291(46):24215–30.
- 653 45. Hannon RA, Clowes JA, Eagleton AC, Al Hadari A, Eastell R, Blumsohn A. Clinical  
654 performance of immunoreactive tartrate-resistant acid phosphatase isoform 5b as a marker  
655 of bone resorption. *Bone* 2004; 34:187–94.
- 656 46. Coker OO, Warit S, Rukseree K, Summpunn P, Prammananan T, Palittapongarnpim P.  
657 Functional characterization of two members of histidine phosphatase superfamily in  
658 *Mycobacterium tuberculosis*. *BMC Microbiol*. 2013; 13:292.

- 659 47. Forrellad MA, Blanco FC, Marrero Diaz de Villegas R, Vázquez CL, Yaneff A, García  
660 EA, et al. Rv2577 of *Mycobacterium tuberculosis* Is a Virulence Factor With Dual  
661 Phosphatase and Phosphodiesterase Functions. *Front Microbiol.* 2020;11:570794.
- 662 48. Bertok DZ. DNA Damage Repair and Bacterial Pathogens. Miller V, editor. *PLoS Pathog.*  
663 2013;9(11):e1003711.
- 664 49. Guo S, Xue R, Li Y, Wang SM, Ren L et al. The CFP10/ESAT6 complex of  
665 *Mycobacterium tuberculosis* may function as a regulator of macrophage cell death at  
666 different stages of tuberculosis infection. *Medical hypotheses.* 2018; 78 (3) :389-92.
- 667 50. Forrellad MA, Klepp LI, Gioffré A, Sabio y García J, Morbidoni HR, de la Paz Santangelo  
668 M, et al. Virulence factors of the *Mycobacterium tuberculosis* complex. *Virulence.*  
669 2013;4(1):3–66.
- 670 51. Nours JL, Bulloch EM, Zhang Z, et al. Structural analyses of a purine biosynthetic enzyme  
671 from *Mycobacterium tuberculosis* reveal a novel bound nucleotide. *J Biol Chem.*  
672 2011;286(47):40706-40716.
- 673 52. Sasseti CM, Rubin EJ. Genetic requirements for mycobacterial survival during infection.  
674 *Proceedings of the National Academy of Sciences.* 2003;100(22):12989–94.
- 675 53. Eoh H, Rhee KY. Multifunctional essentiality of succinate metabolism in adaptation to  
676 hypoxia in *Mycobacterium tuberculosis*. *Proceedings of the National Academy of*  
677 *Sciences.* 2013;110(16):6554–9.
- 678 54. Ryndak MB, Singh KK, Peng Z, Laal S. Transcriptional profiling of *Mycobacterium*  
679 *tuberculosis* replicating in the human type II alveolar epithelial cell line, A549. *Genomics*  
680 *Data.* 2015;5:112–4.

- 681 55. Garg, A., Gupta, D. VirulentPred: a SVM based prediction method for virulent proteins in  
682 bacterial pathogens. BMC Bioinformatics. 2008; 9:62.
- 683 56. Saha S, Raghava GPS. VICMpred: An SVM-based Method for the Prediction of  
684 Functional Proteins of Gram-negative Bacteria Using Amino Acid Patterns and  
685 Composition. Genomics, Proteomics & Bioinformatics. 2006;4(1):42–7.
- 686 57. Becq J, Gutierrez MC, Rosas-Magallanes V, Rauzier J, Gicquel B, Neyrolles O, et al.  
687 Contribution of horizontally acquired genomic islands to the evolution of the tubercle  
688 bacilli. Mol Biol Evol. 2007;24(8):1861–71.
- 689 58. Bai G, McCue LA, McDonough KA. Characterization of Mycobacterium tuberculosis  
690 Rv3676 (CRPMt), a cyclic AMP receptor protein-like DNA binding protein. J Bacteriol.  
691 2005;187(22):7795–804.
- 692 59. Flores-Valdez MA, Morris RP, Laval F, Daffé M, Schoolnik GK. Mycobacterium  
693 tuberculosis modulates its cell surface via an oligopeptide permease (Opp) transport  
694 system. The FASEB Journal. 2009;23(12):4091–104.
- 695 60. Mitra A, Ko YH, Cingolani G, Niederweis M. Heme and hemoglobin utilization by  
696 Mycobacterium tuberculosis. Nat Commun. 2019; 10:4260.
- 697 61. Singh PP, Parra M, Cadieux N, Brennan MJ. A comparative study of host response to three  
698 Mycobacterium tuberculosis PE\_PGRS proteins. Microbiology. 2008;154(11):3469–79.
- 699 62. Kruh NA, Troudt J, Izzo A, Prenni J, Dobos KM. Portrait of a Pathogen: The  
700 *Mycobacterium tuberculosis* Proteome In Vivo. PLOS ONE. 2010;5(11): e13938.

701 63. Buttery LD, Bourne S, Xynos JD, Wood H, Hughes FJ, Hughes SP, et al. Differentiation  
702 of osteoblasts and in vitro bone formation from murine embryonic stem cells. *Tissue Eng.*  
703 2001;7(1):89–99.

704



705 **Figures**

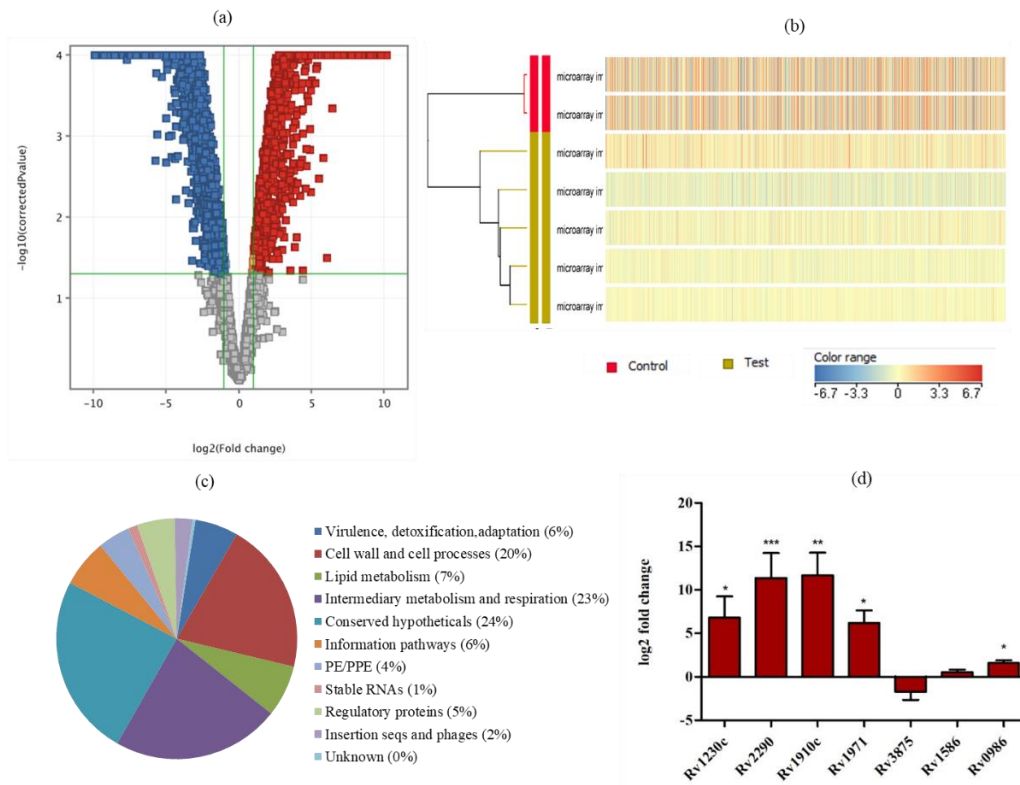

706

**Fig. 1: Transcriptional profile of *Mycobacterium tuberculosis* in abscess or necrotic tissue obtained from bone TB patients.** (a) Volcano plot represents the distribution of all differentially expressed mycobacterial genes filtered on the basis of  $>2$  or  $<-2$  fold change and corrected p-value of 0.05. Red color represents upregulation, blue represents downregulation and grey with no change. (b) Heat map reflecting the hierarchical clustering of differentially expressed mycobacterial genes in bone TB specimen obtained from five different patients, red color represents upregulated genes, blue represents downregulated genes and yellow color with no change in gene expression. (c) Pie chart represents the functional categories of all differentially expressed mycobacterial genes as determined by Tuberculist (d) qRT-PCR validation of a subset of differentially expressed mycobacterial genes selected from microarray in human bone TB specimen (n=6).

707

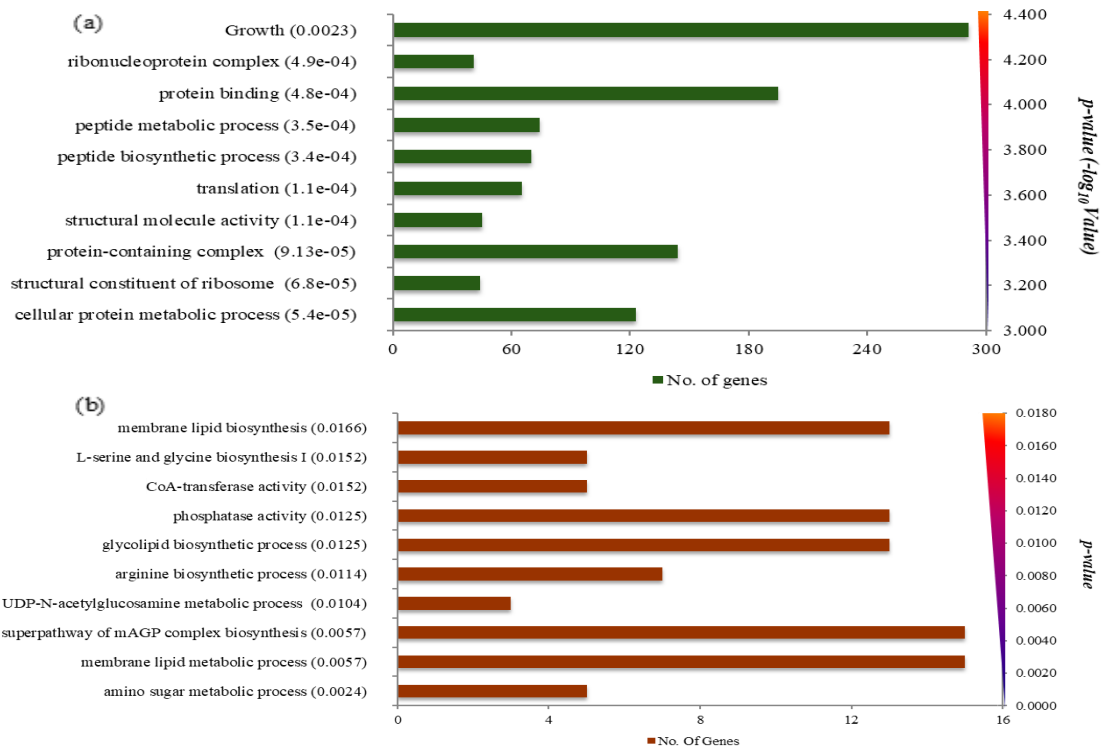

**Fig. 2: Significantly enriched pathways correspond to differentially upregulated and downregulated mycobacterial genes using Biocyc database.** Bar graph for top 10 enriched pathways for differentially (a) downregulated pathways,  $p$ -value computed using fisher's exact test and post-hoc Benjamini Hochberg's correction. (b) upregulated pathways,  $p$ -value calculated using fisher's exact test. X-axis shows the no. of genes and Y-axis represents  $p$ -value.  $p$ -value  $>0.05$  is considered statistically significant.

708

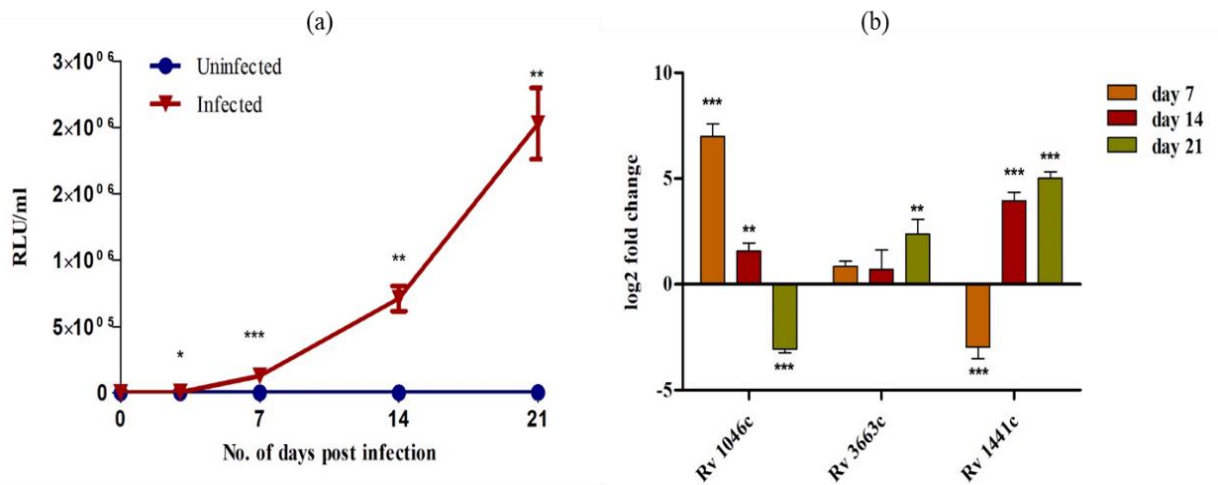

**Fig. 3: Intracellular multiplication of Mtb H37Rv-lux and gene expression analysis of intracellular Mycobacterium tuberculosis (*M. tuberculosis*) within osteoblasts:** MC3T3 osteoblast cell were infected with Mtb H37Rv-lux and incubated upto 21days post infection. a) Fold multiplication of Mtb in osteoblasts in terms of RLU/ml at different days of infection. p-value calculated by using student's t-test to compare the infected vs. uninfected control samples at each time point. b) Gene expression analysis of in-silico identified virulent proteins of iMtb extracted from H37Rv-lux infected osteoblasts at different time points in comparison to H37Rv-lux. 16S rRNA was used as house-keeping gene for normalization. Log2 fold change was calculated using  $2^{-\Delta\Delta Ct}$ . Each bar represents the mean  $\pm$ SD of three different sets of experiment for each gene. One-way ANOVA with dunnett's multiple comparison test was used to calculate statistical significance for gene expression of intracellular Mtb post 7d, 14d and 21d infection compared to control Mtb H37Rv-lux. \* $p < 0.05$ , \*\* $p < 0.01$ , \*\*\* $p < 0.001$ .

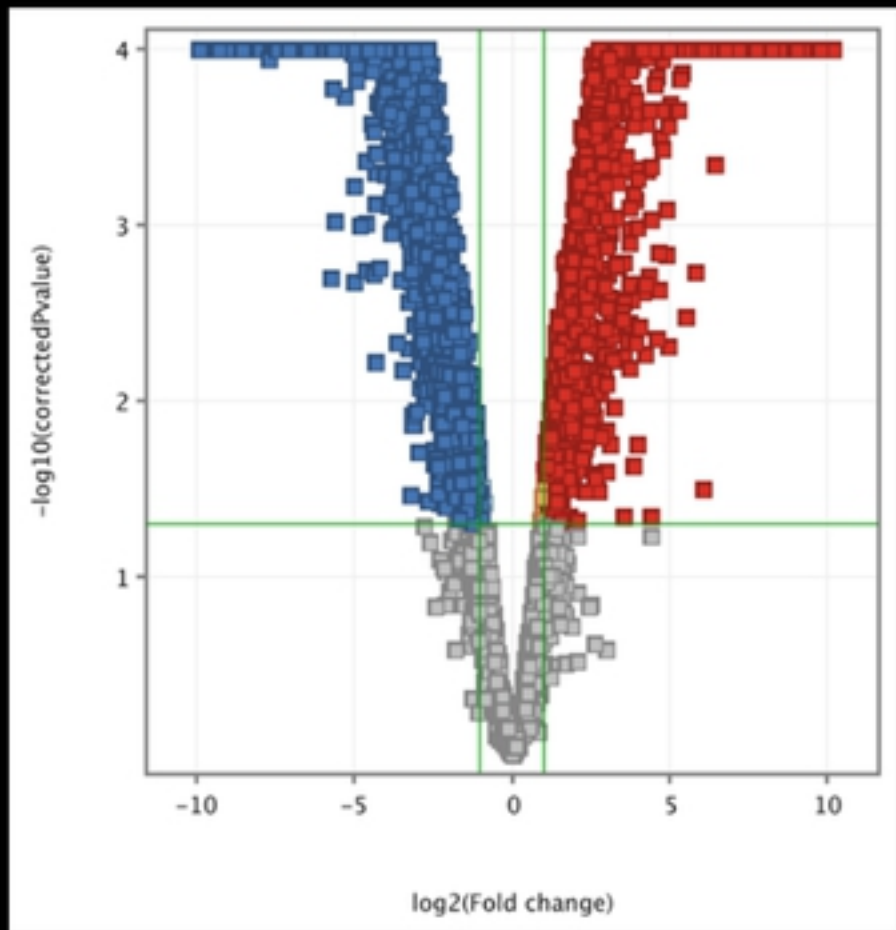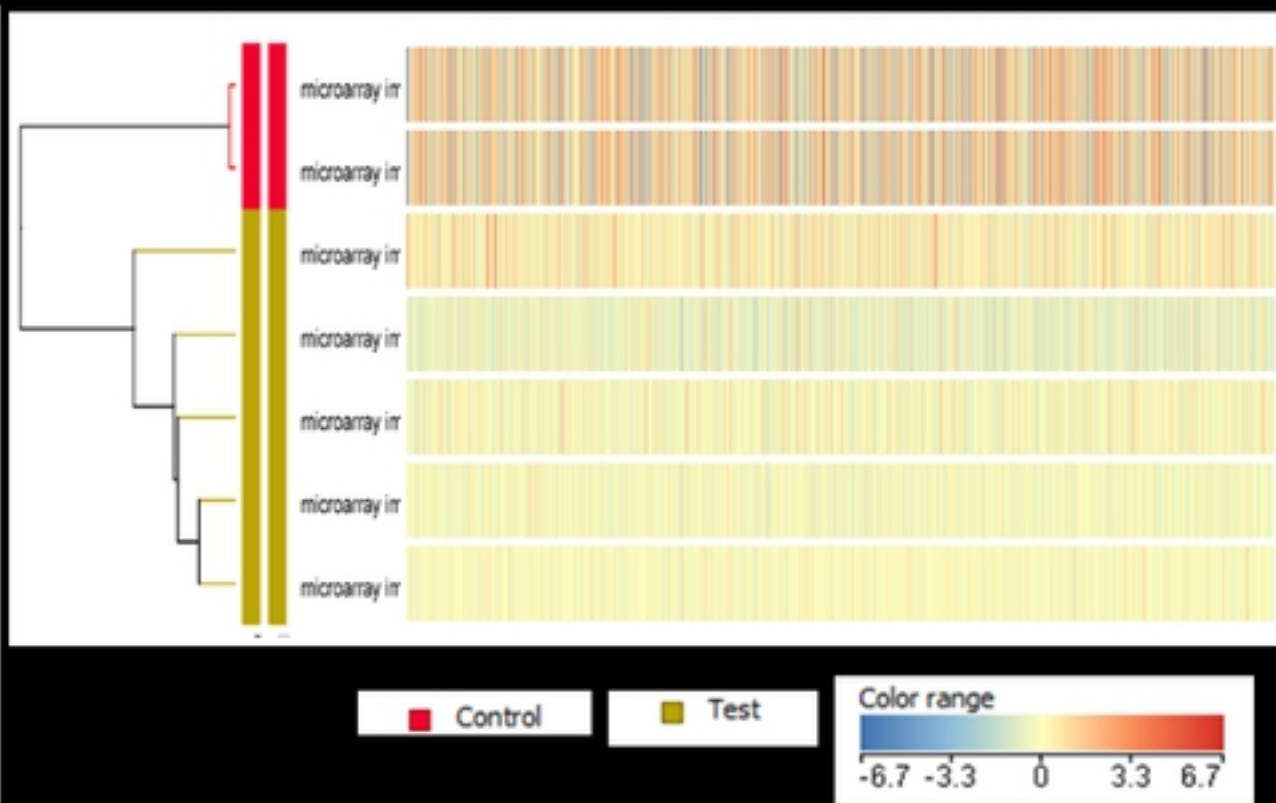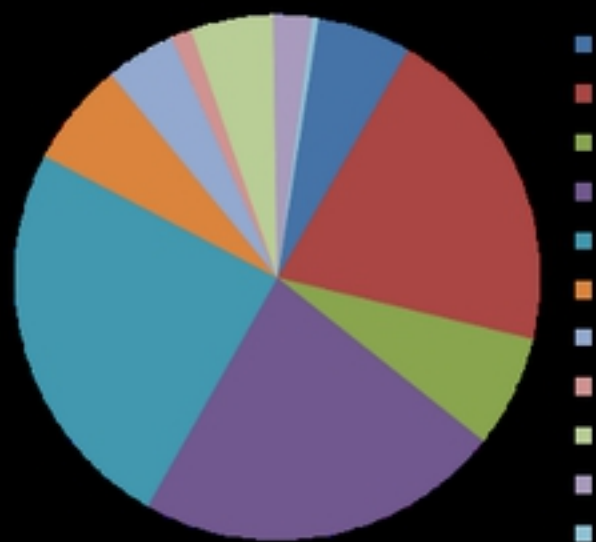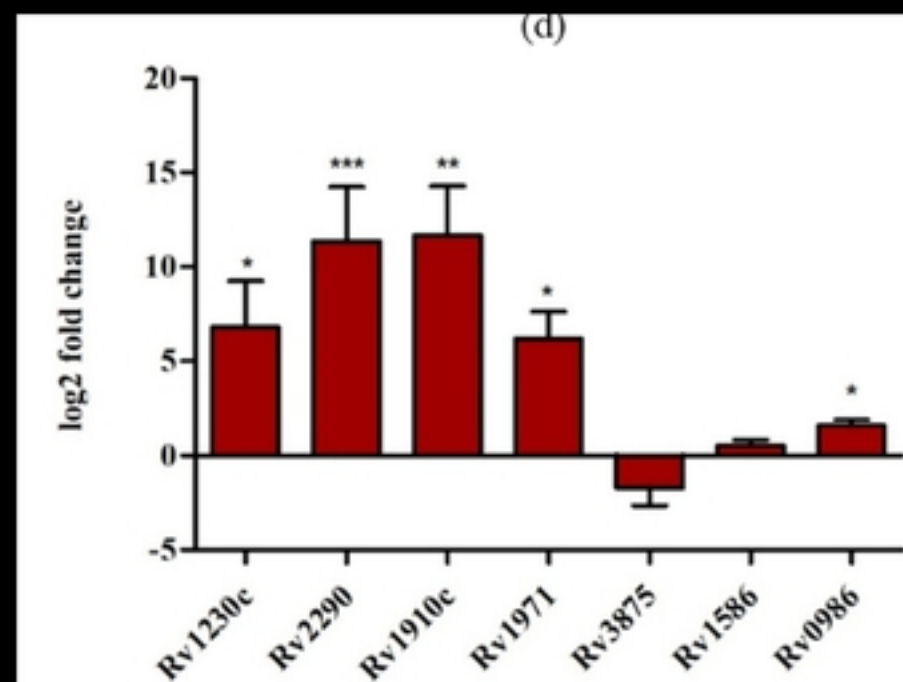

Figure 1

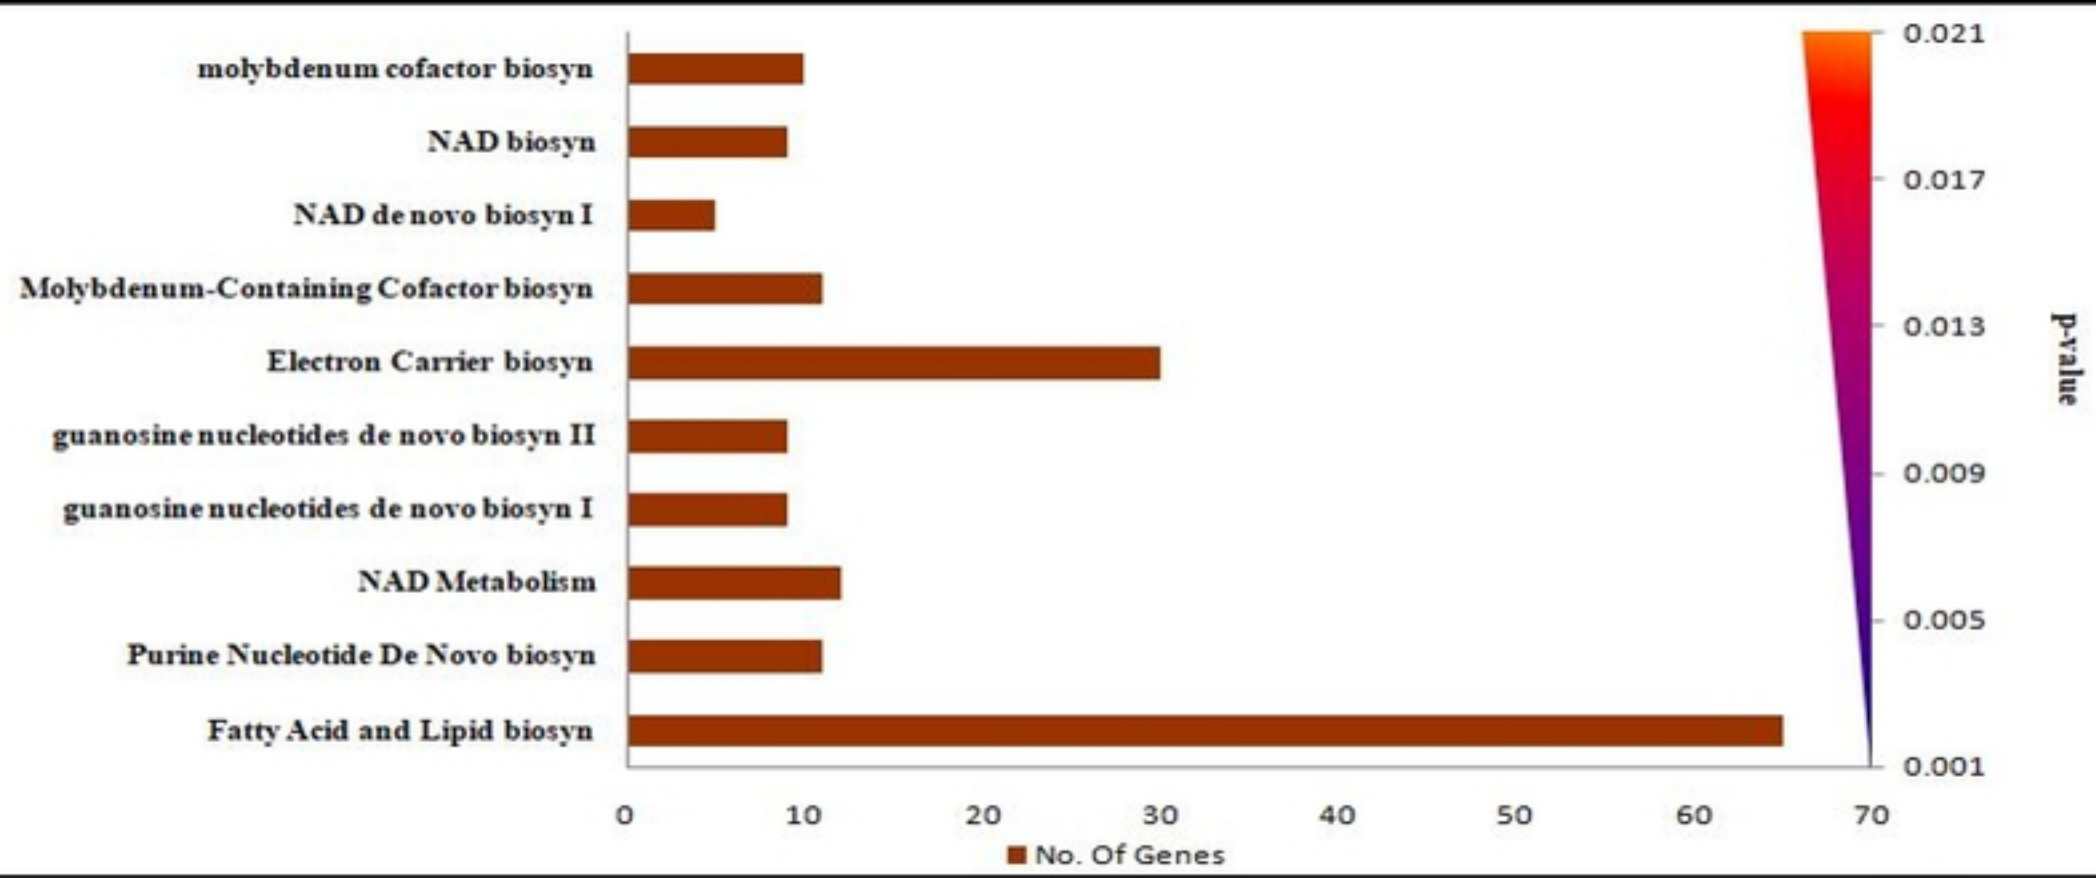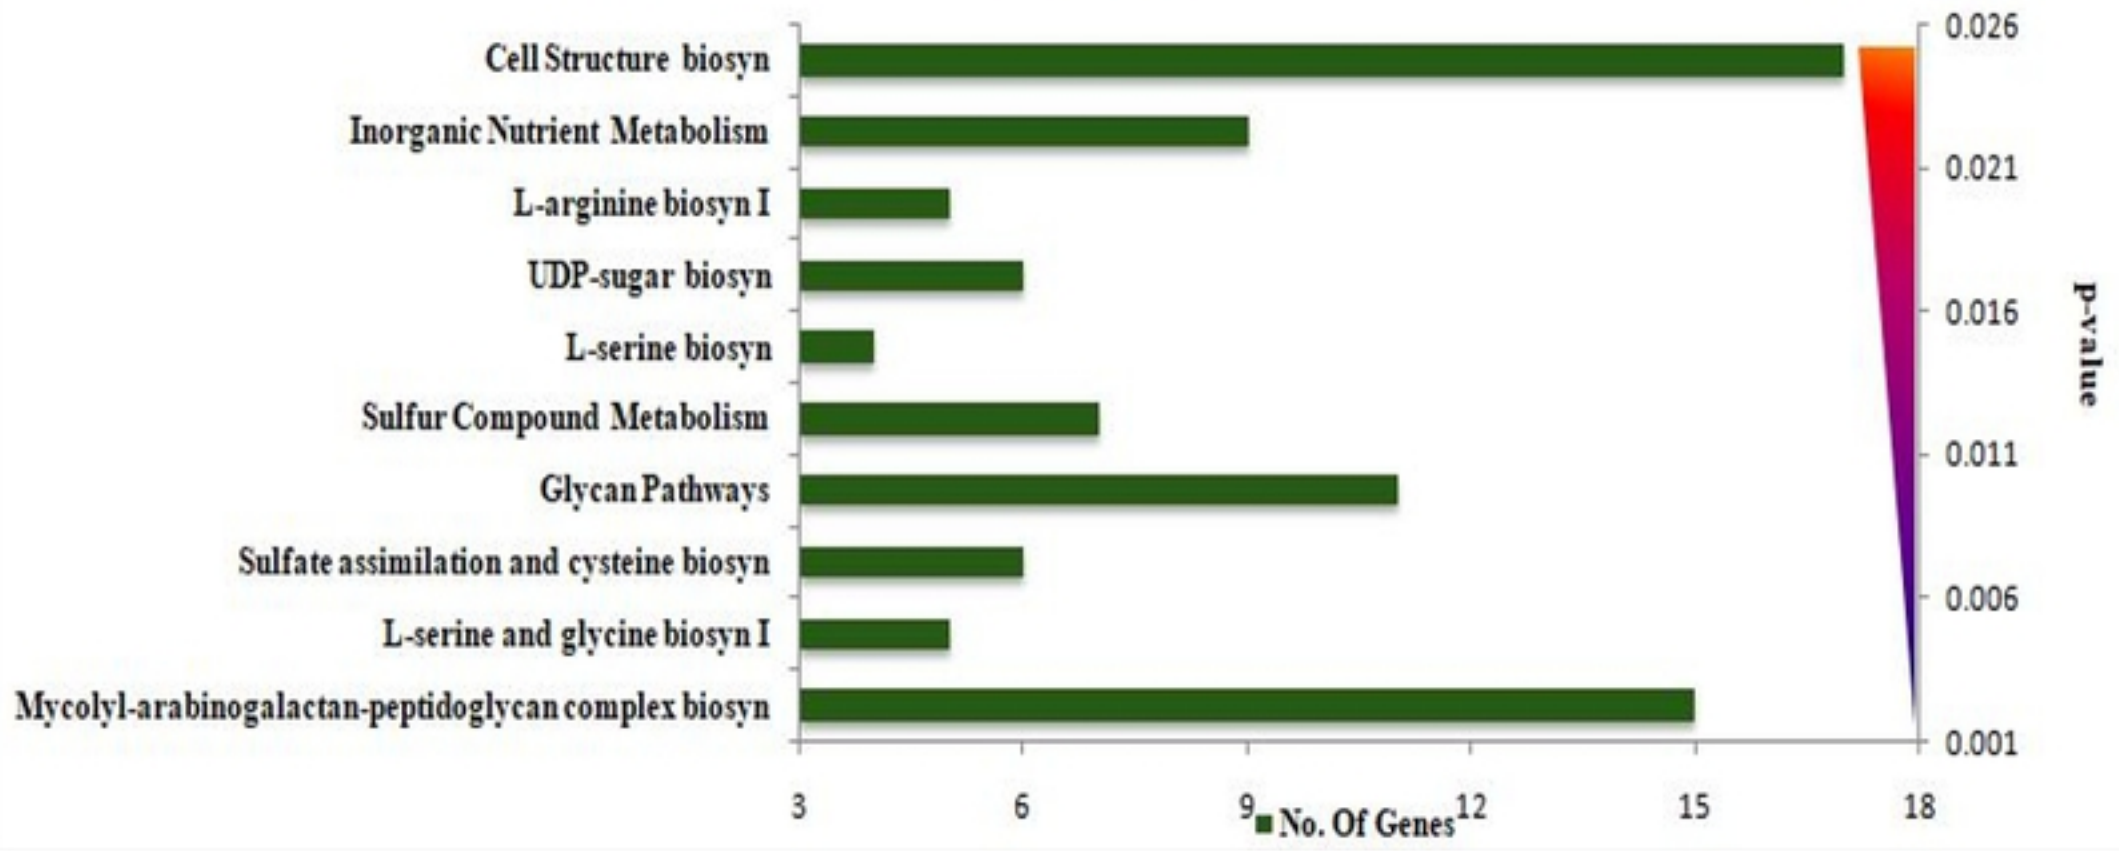

Figure 2

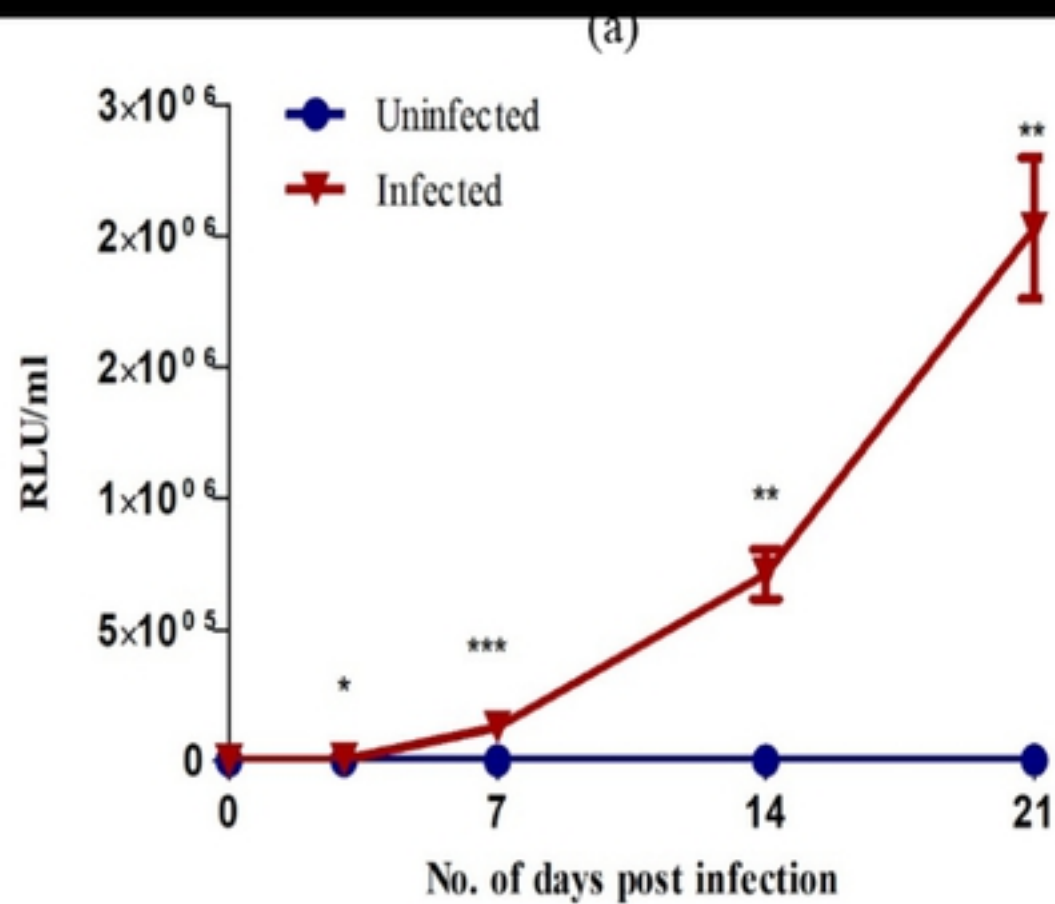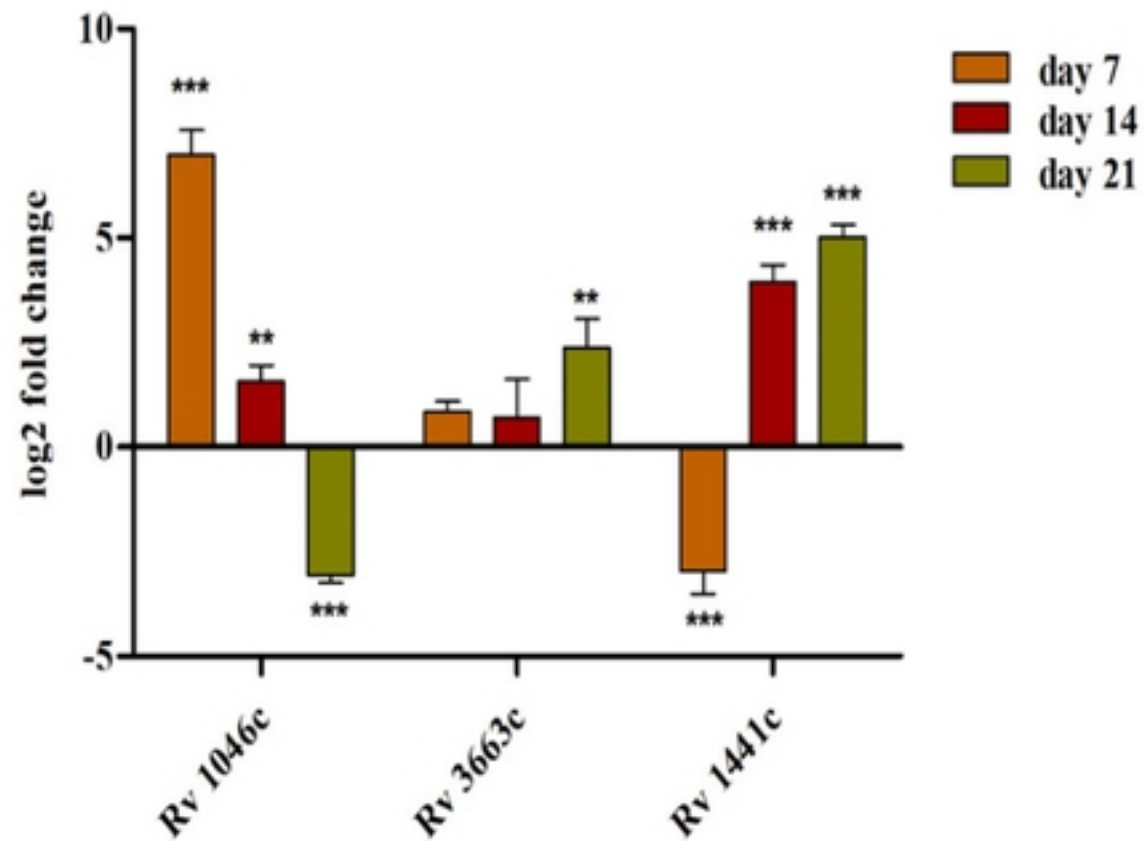

Figure 3
